# Supplementary material for: The Combination of Anti-CD47 Antibody with CTLA4 Blockade Enhances Anti-Tumor Immunity in Non-Small Cell Lung Cancer via Normalization of Tumor Vasculature and Reprogramming of the Immune Microenvironment
Source: MDPI journal article supplement (doi:10.3390/cancers16040832), 2024-02-19
Supplement: s1 [file s1]

A

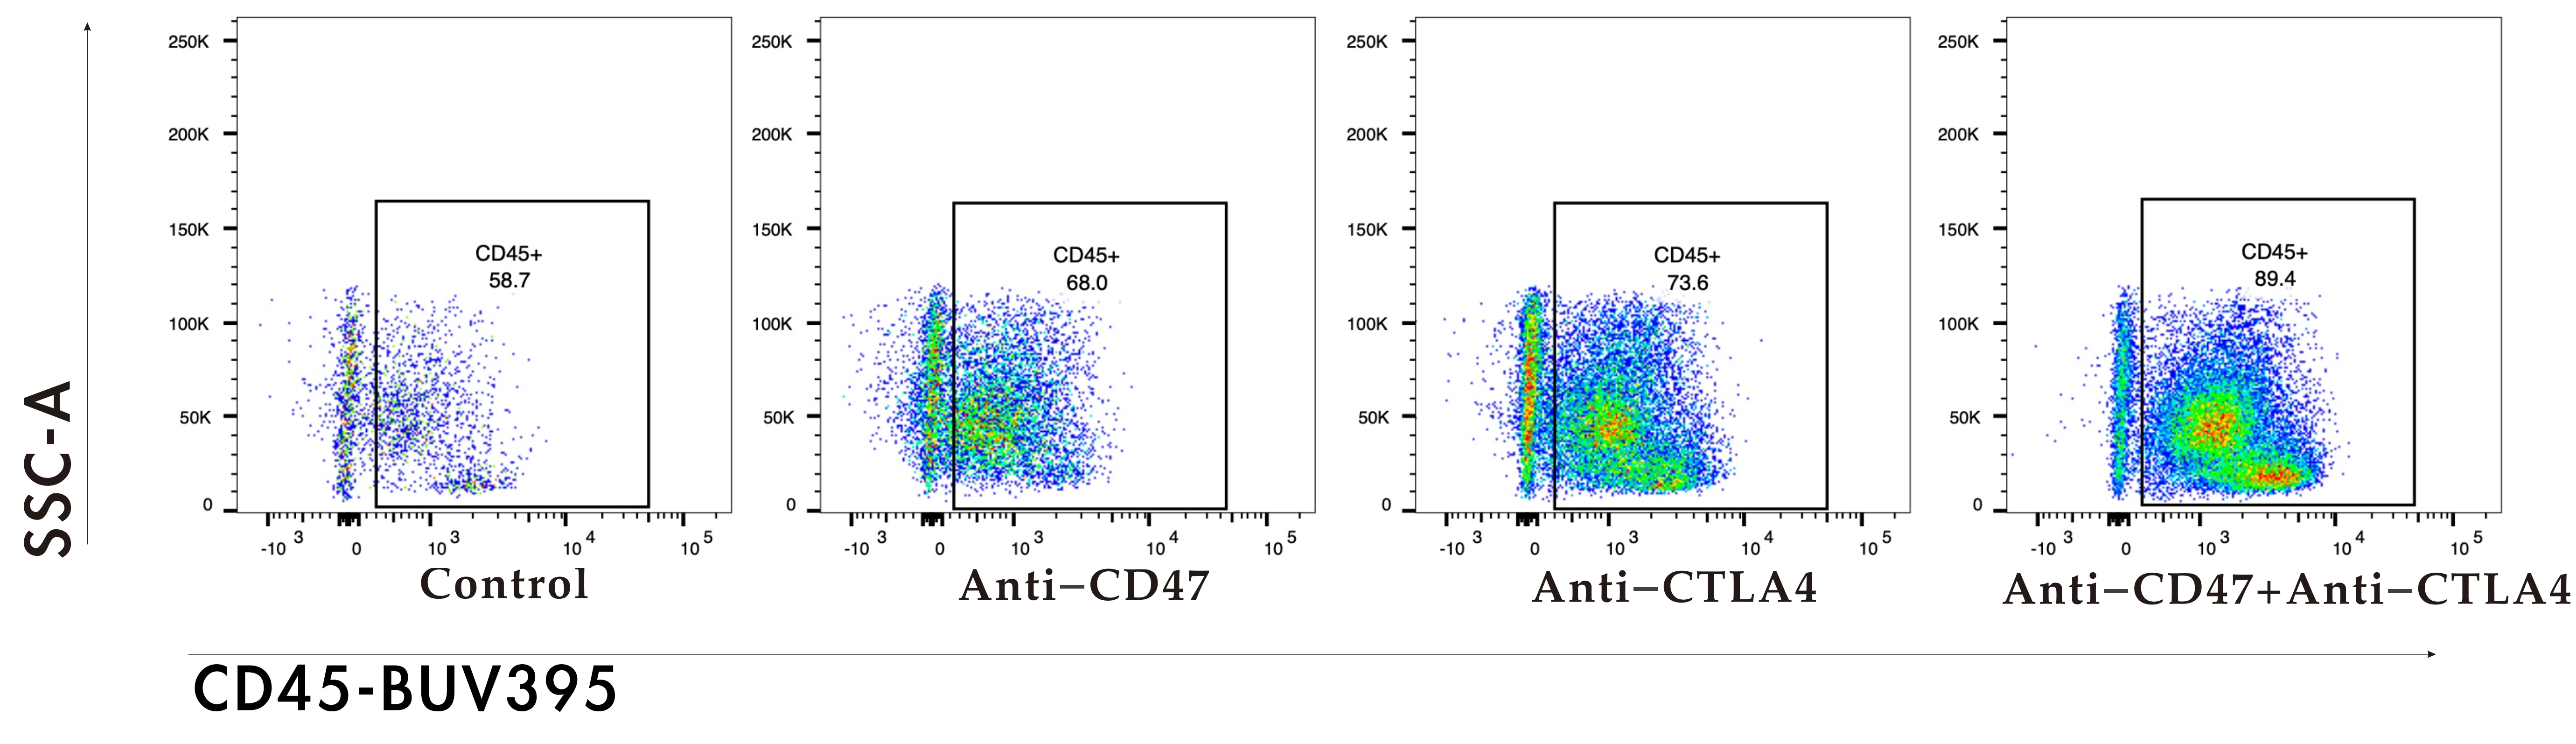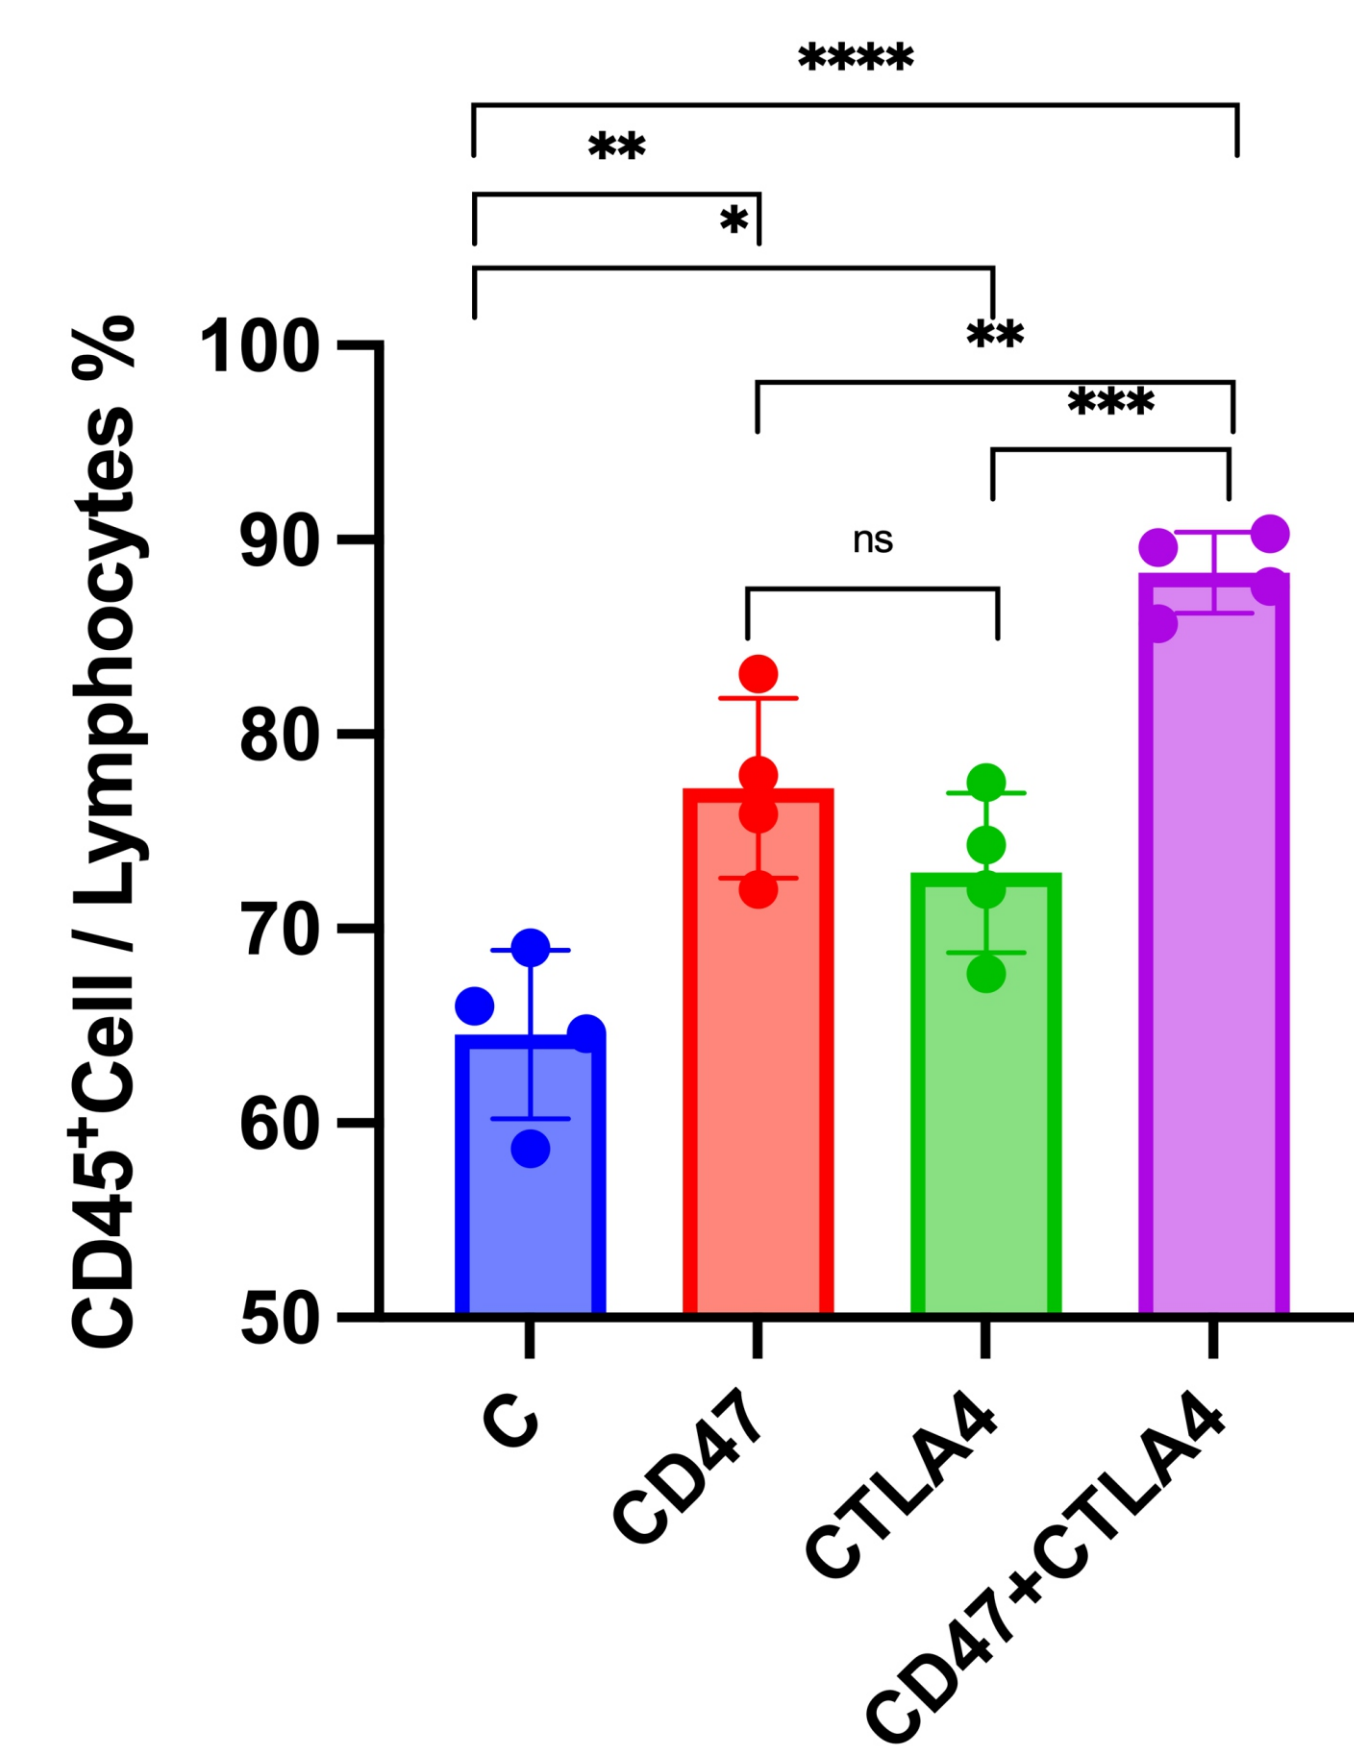

B

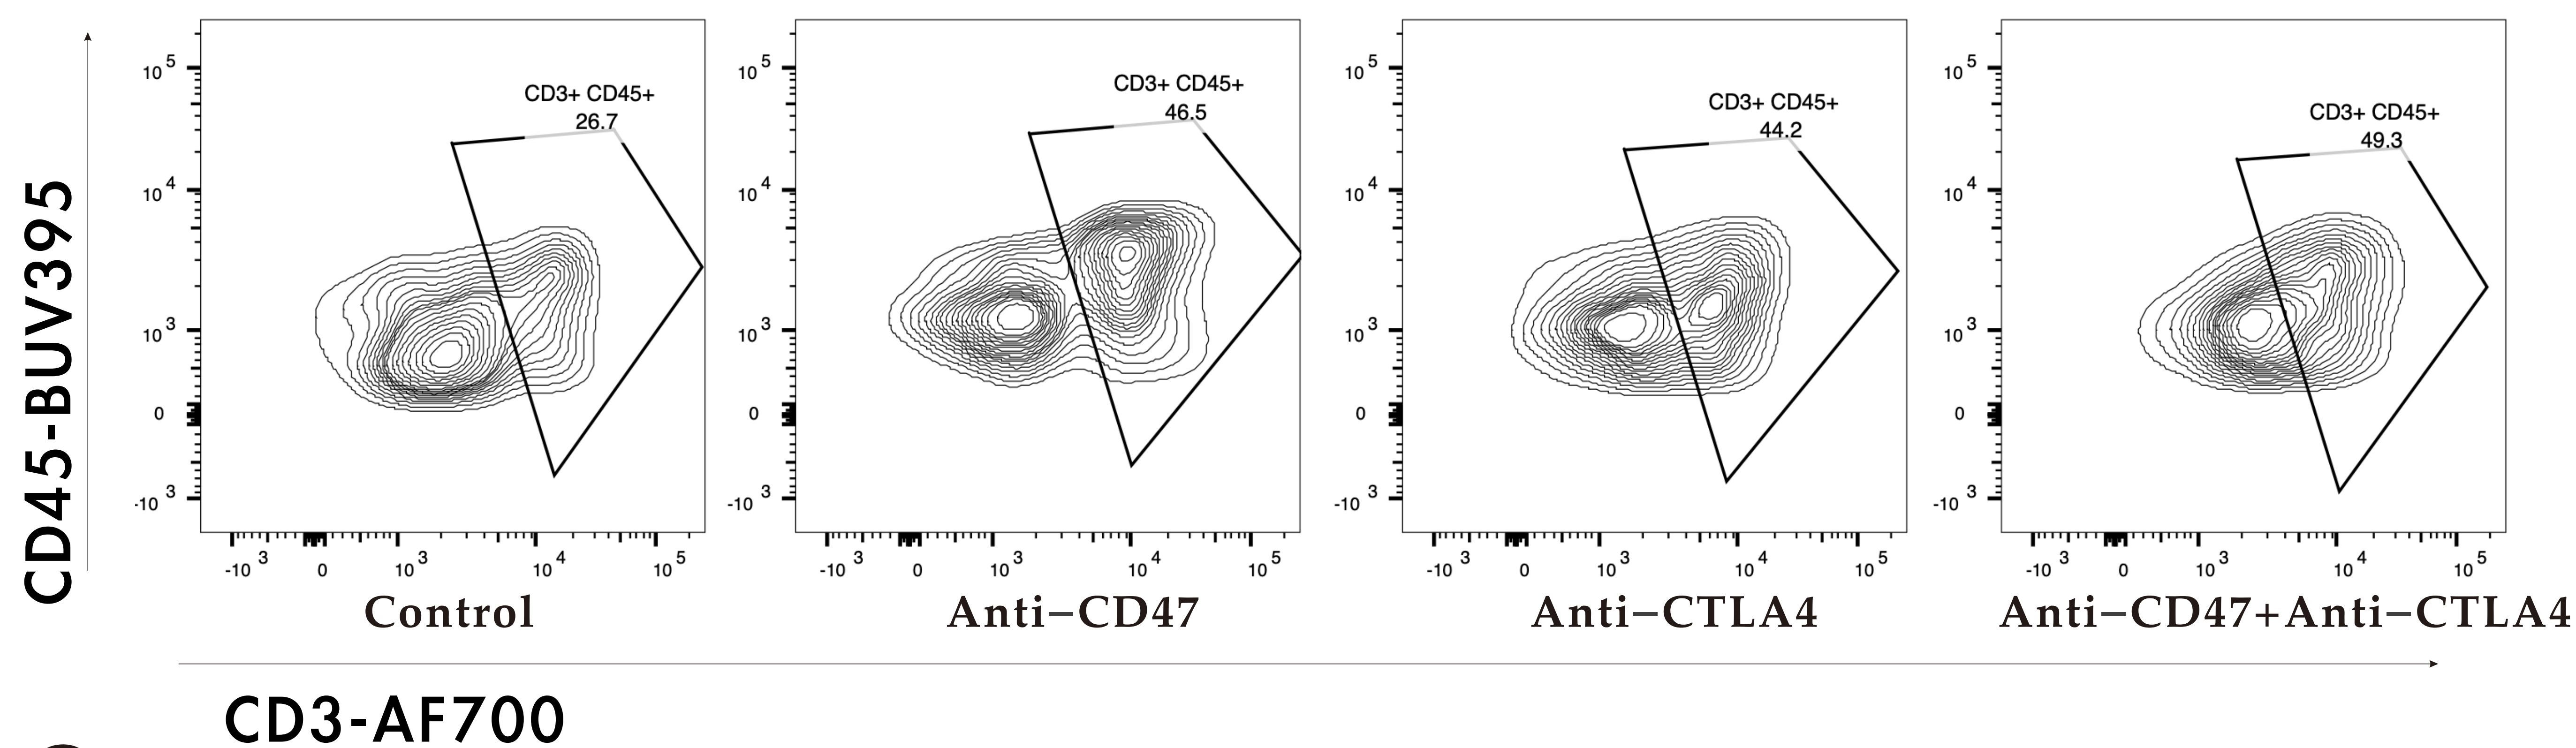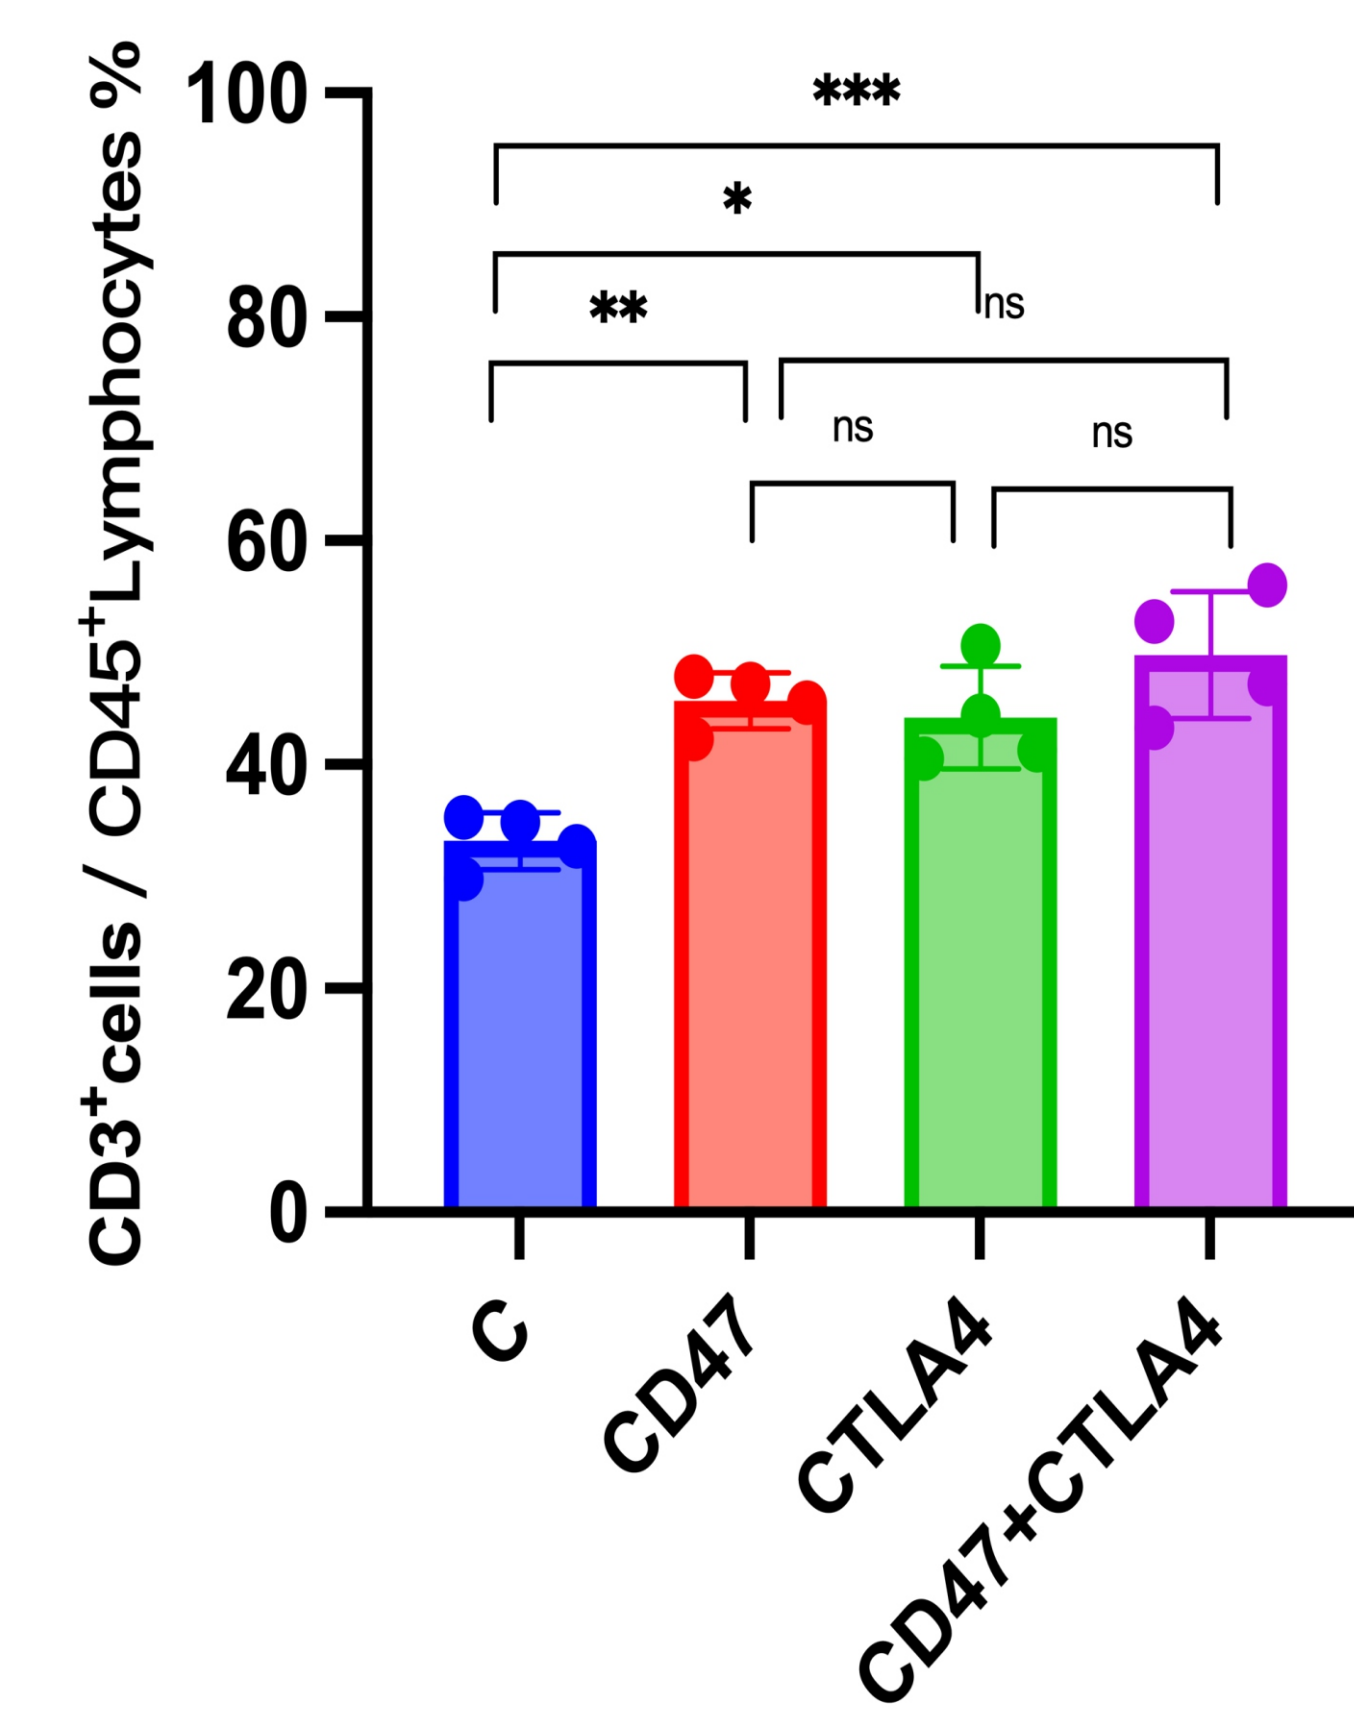

C

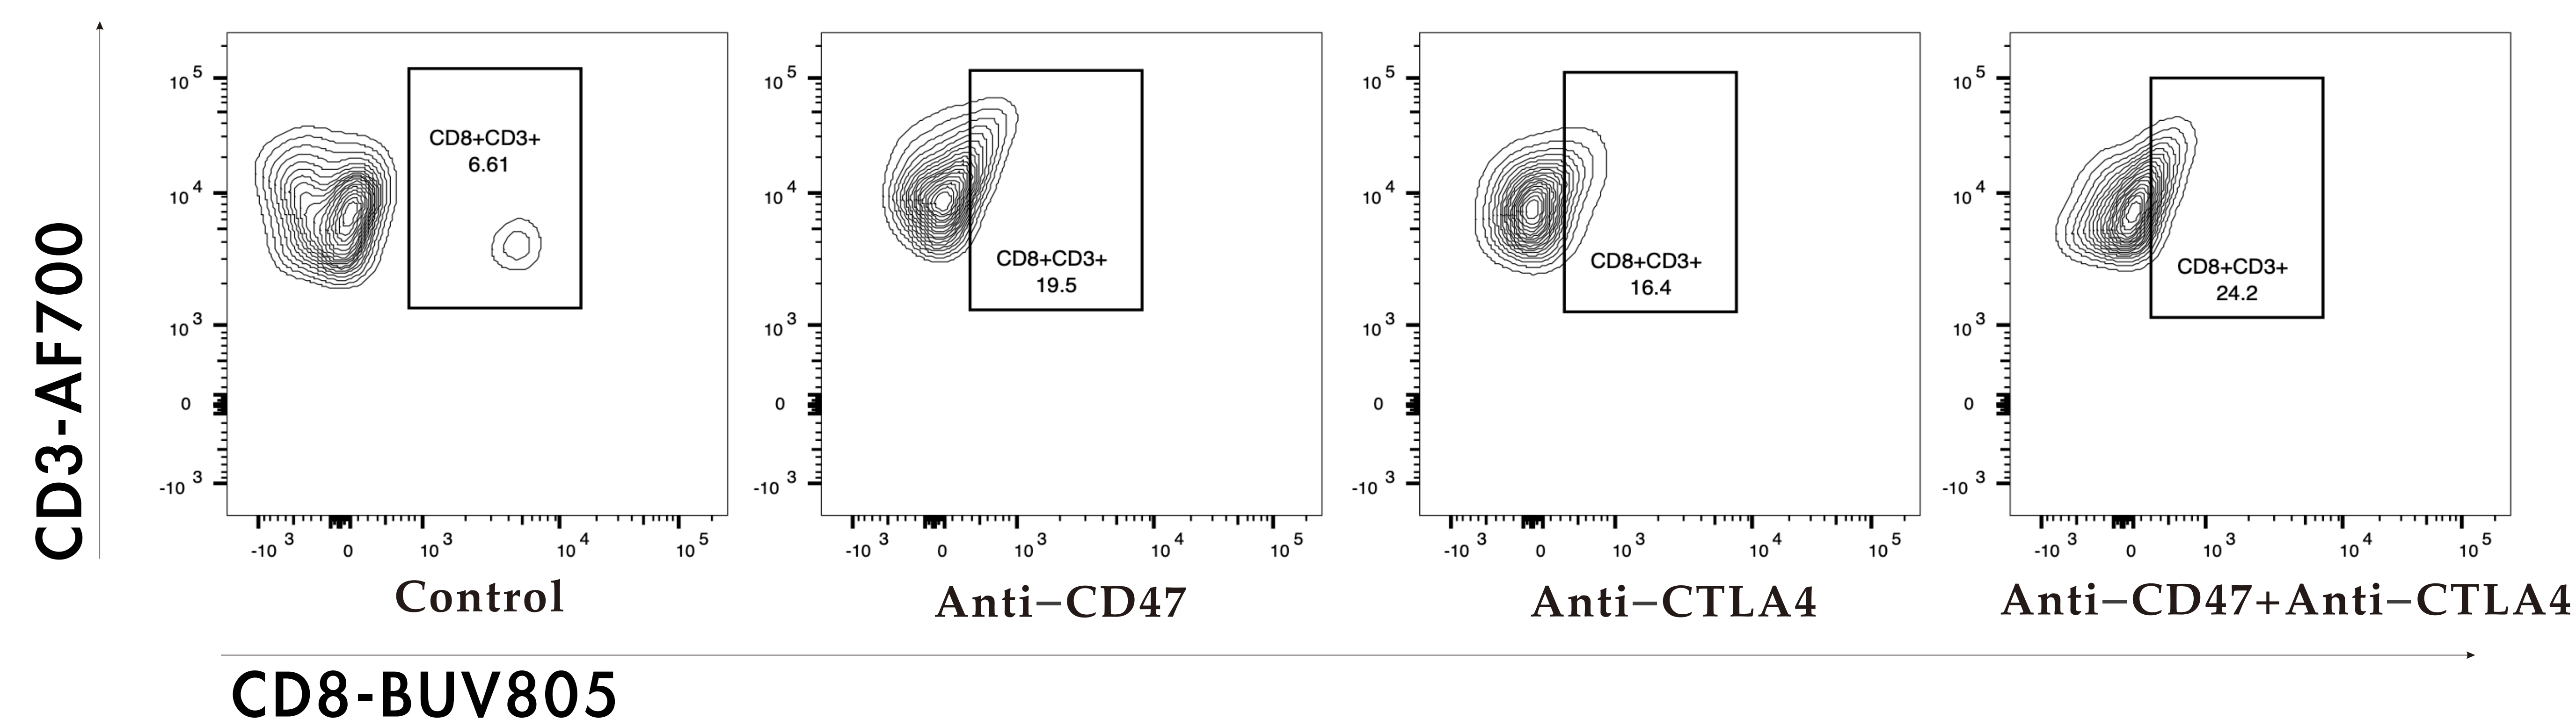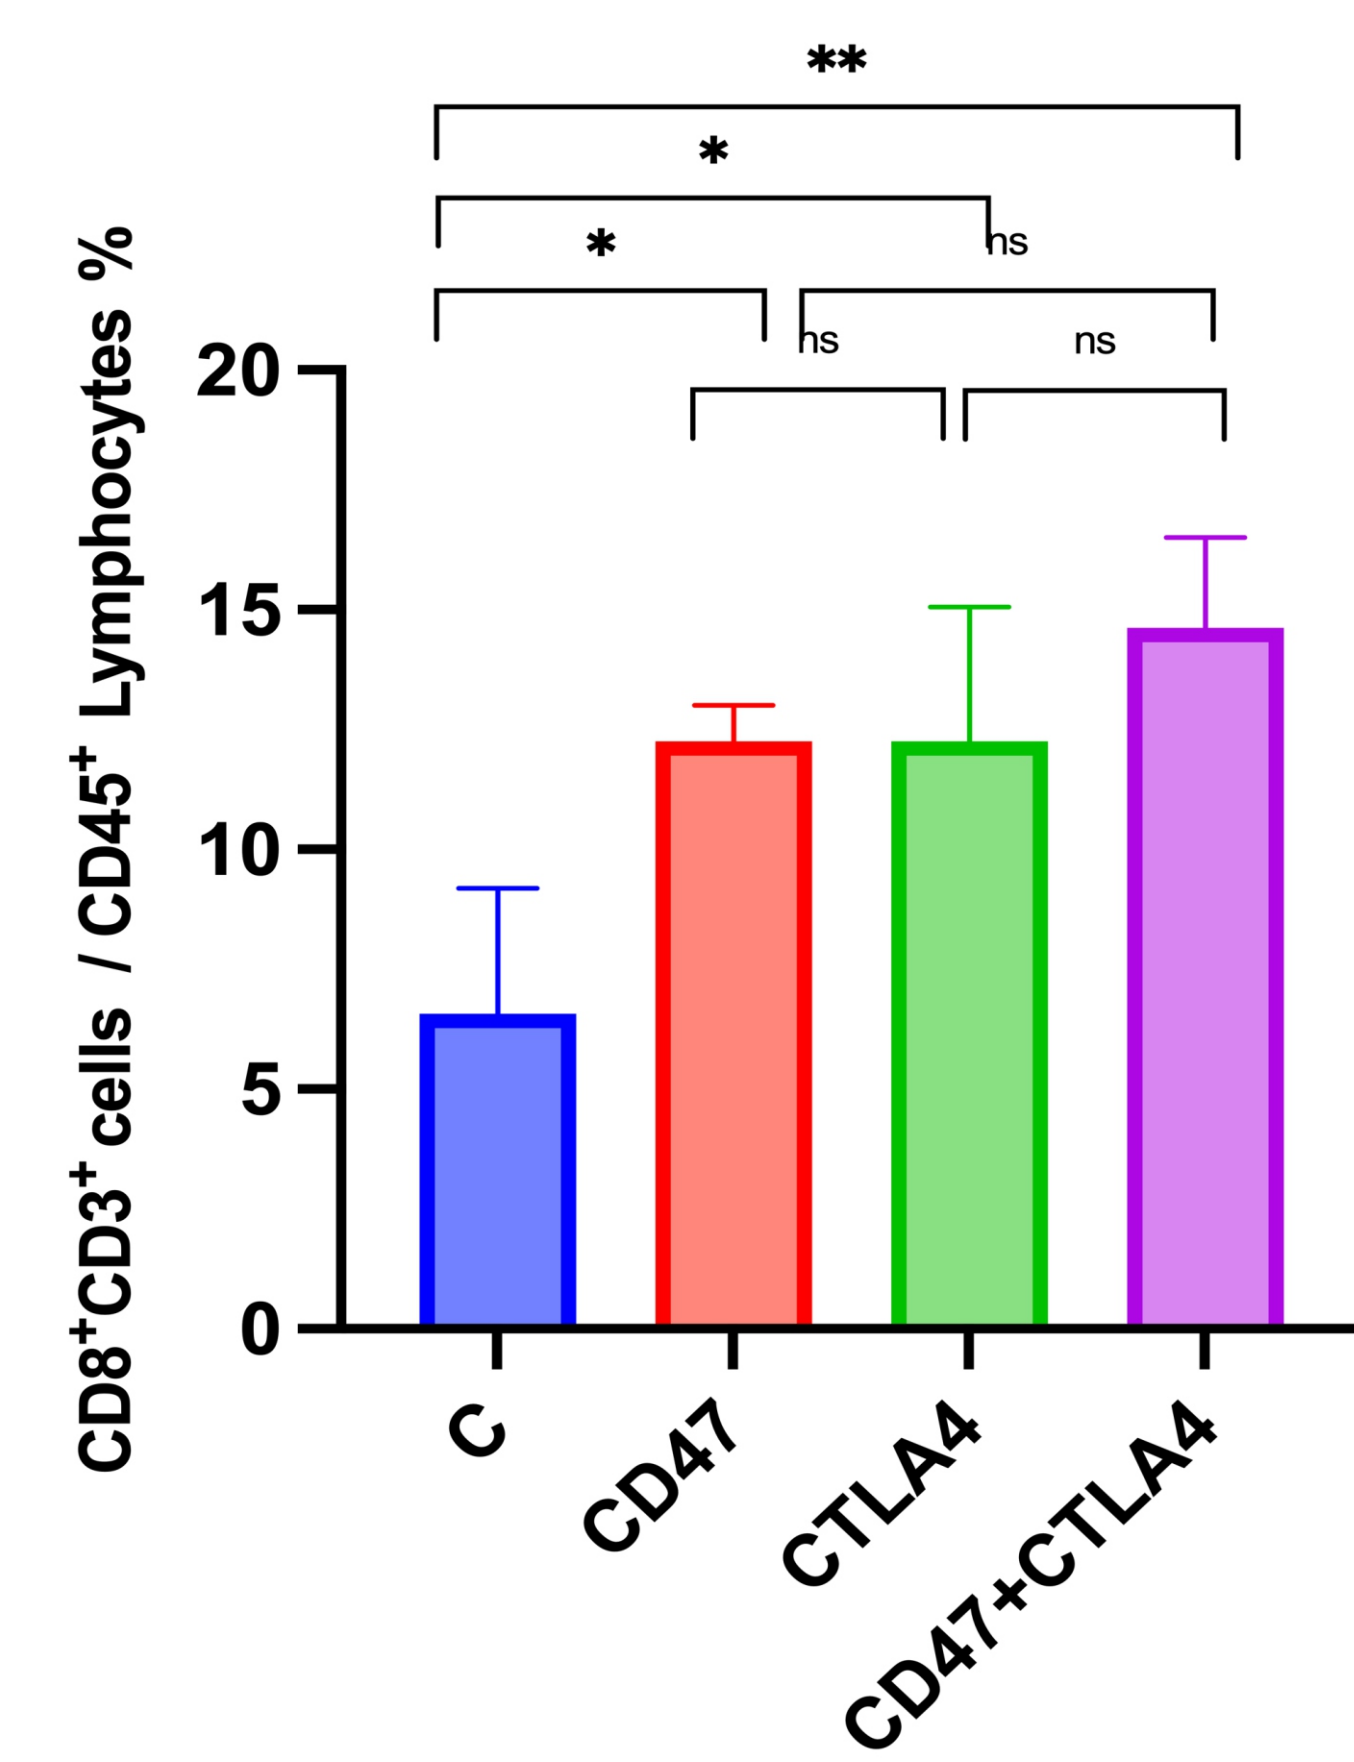

D

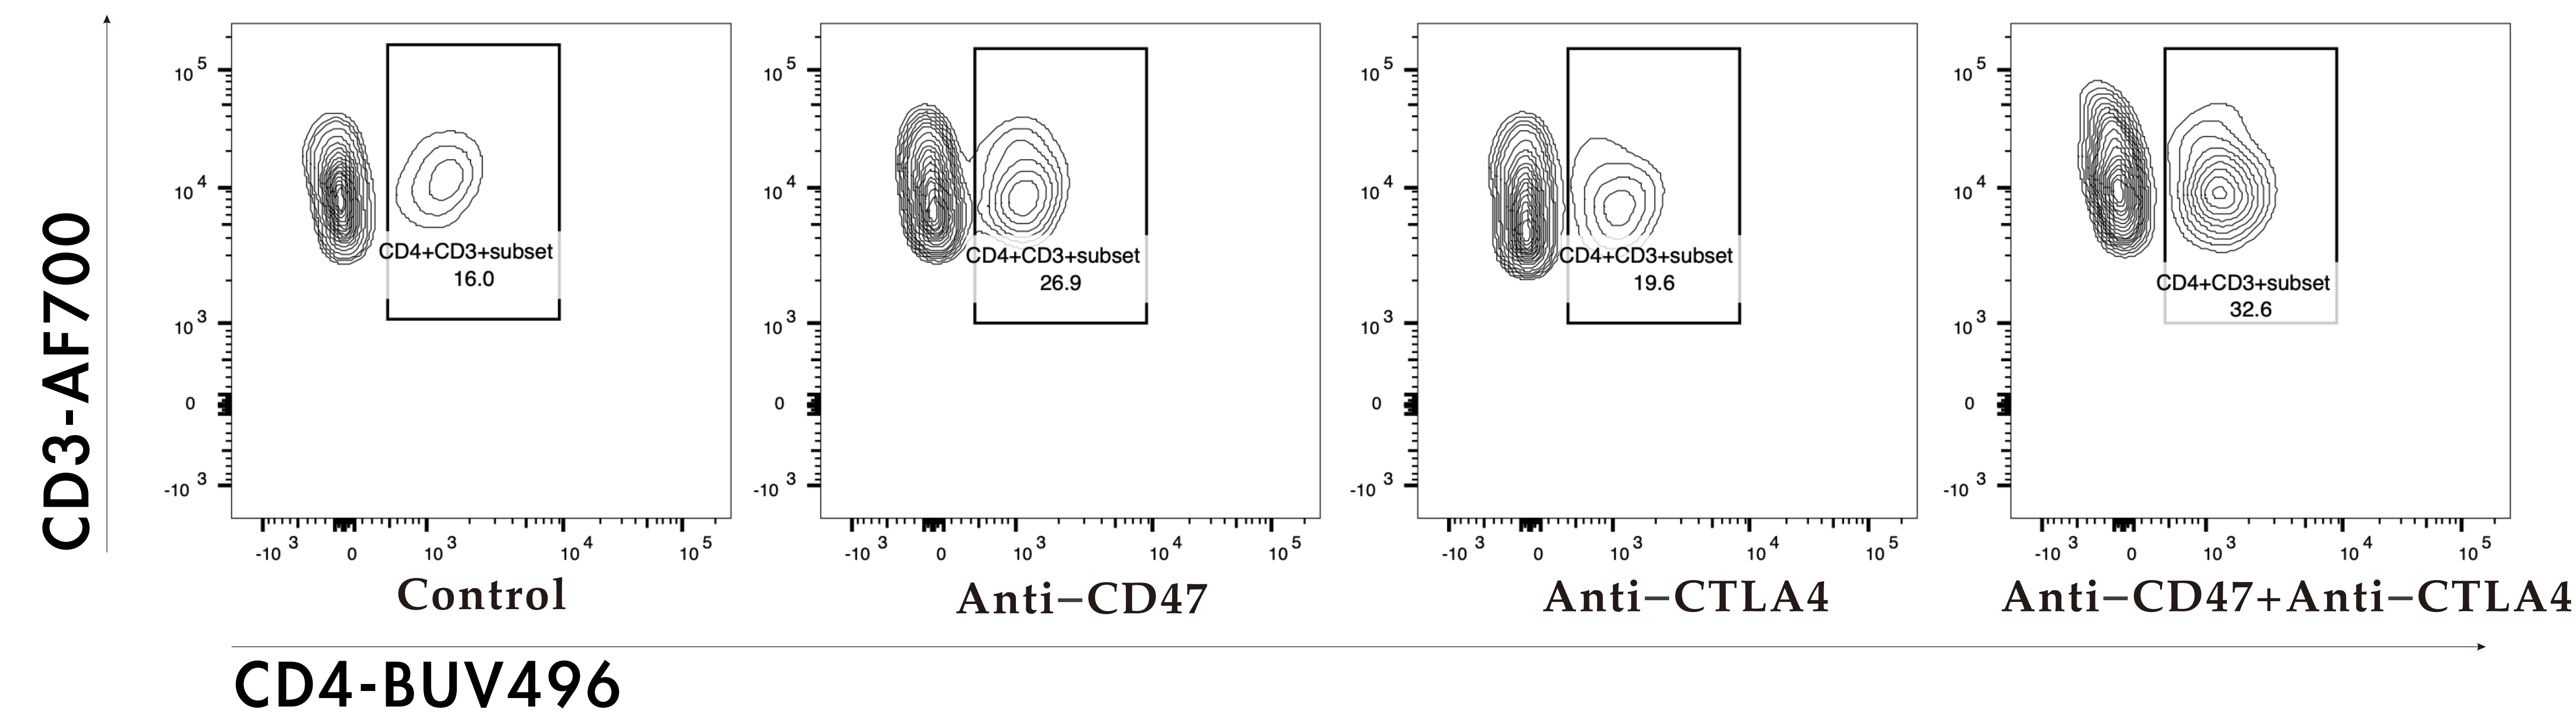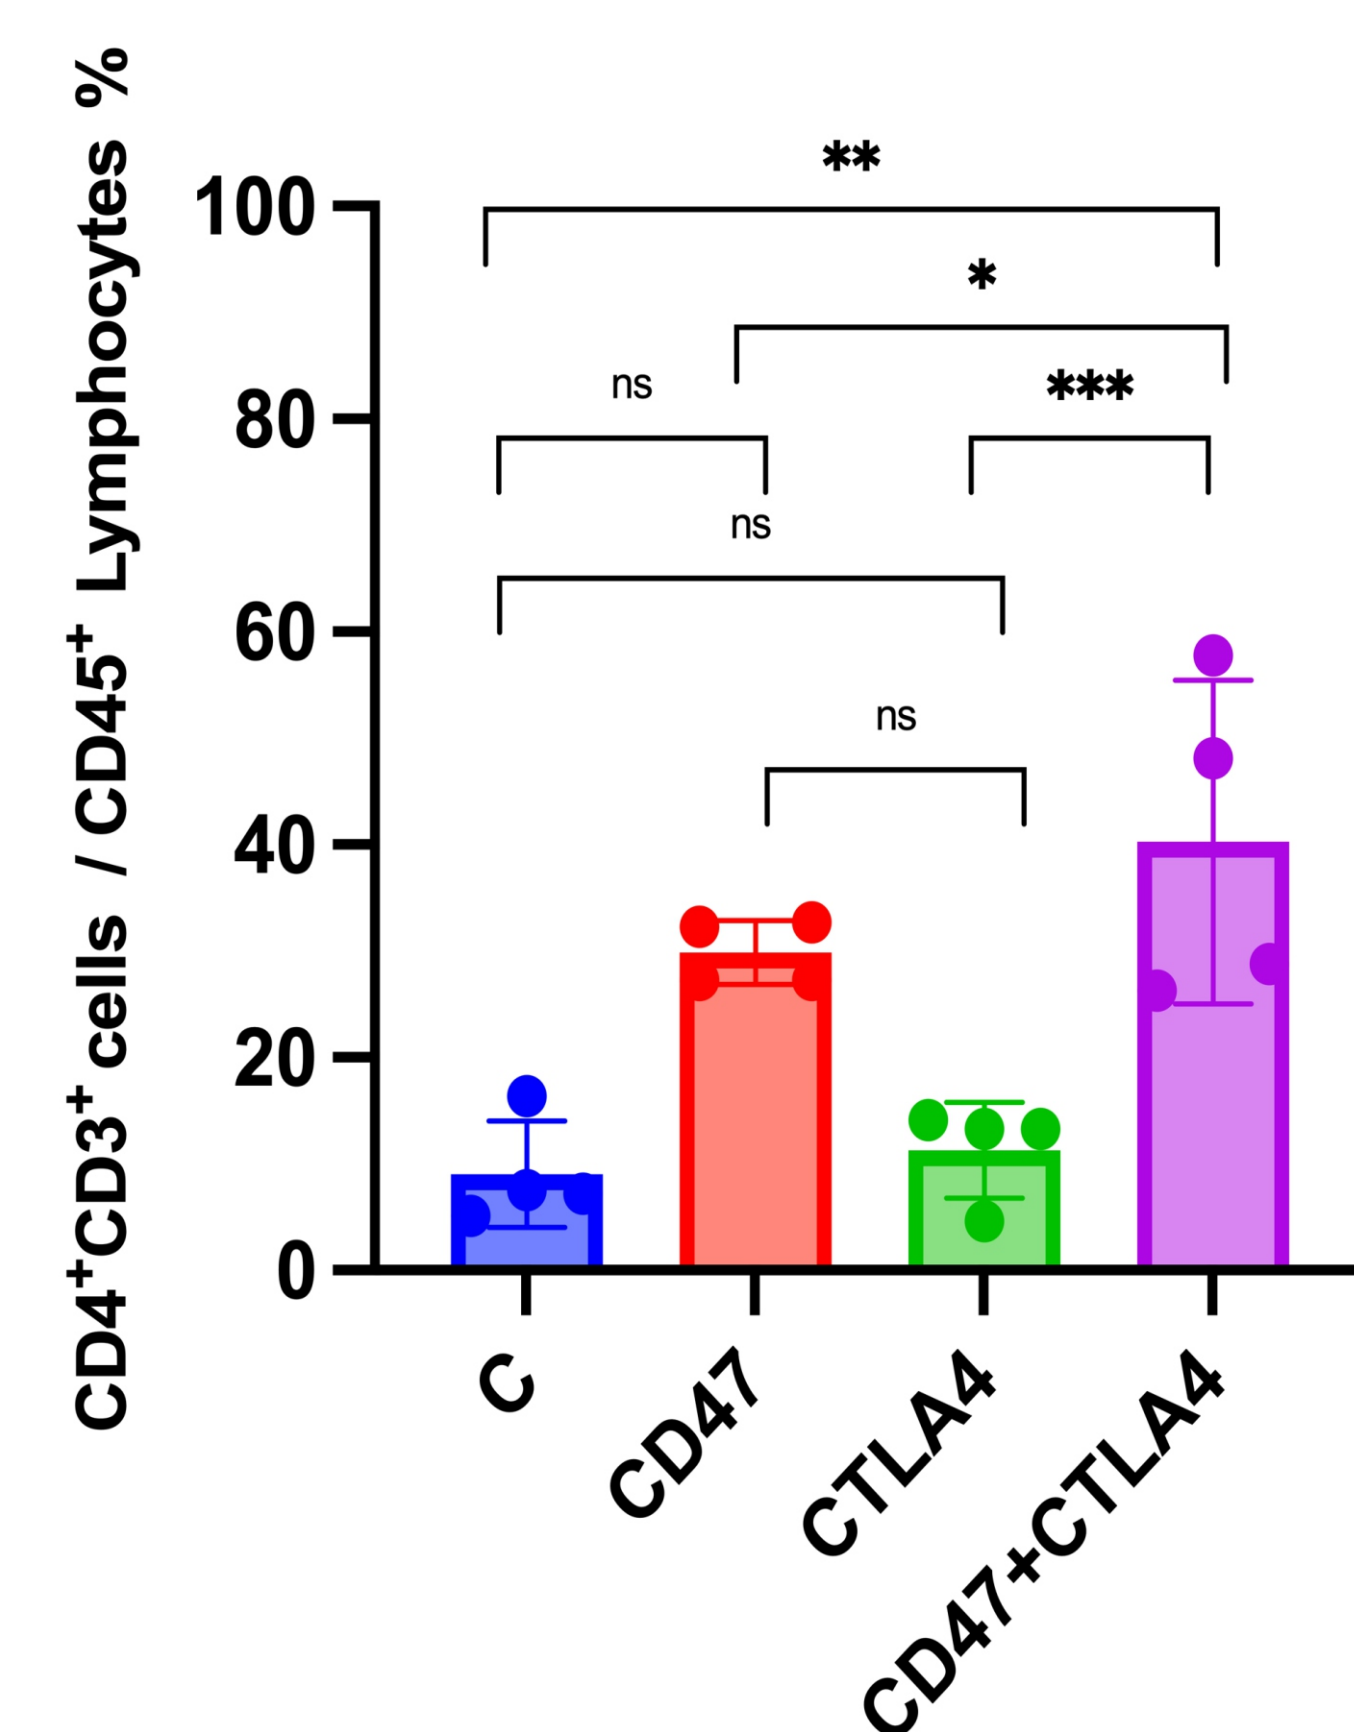



**Figure S1. Changes in fractions of CD45<sup>+</sup>, CD3<sup>+</sup>, or CD8<sup>+</sup> T cells in non-small cell lung cancer (NSCLC) after anti-CD47 antibody (Ab) or anti-CTLA4 Ab (i.e., an immune checkpoint blocker) alone or in combination.** Lewis lung carcinoma (LLC) cells were implanted in C57BL/6 mice treated with control IgG, anti-CD47 Ab, and anti-CTLA4 Ab, alone or in combination. Flow cytometric cell sorting at day 24 revealed the following: (A) Both monotherapy and combination therapy promote intra-tumoral infiltration of CD45<sup>+</sup> cells, with the combination therapy showing the most significant effect. (B) The fraction of CD3<sup>+</sup> T cells increases after anti-CD47 Ab blockade, anti-CTLA4 Ab blockade, or their combination therapy compared to control IgG. (C–D) Combination therapy significantly promotes intra-tumoral infiltration of CD8<sup>+</sup> T cells and CD4<sup>+</sup> T cells compared to other groups. Data in (A–D) are analyzed with a one-way analysis of variance. \* $p < 0.05$ , \*\* $p < 0.01$ , and \*\*\* $p < 0.001$ ; ns, not significant.



A

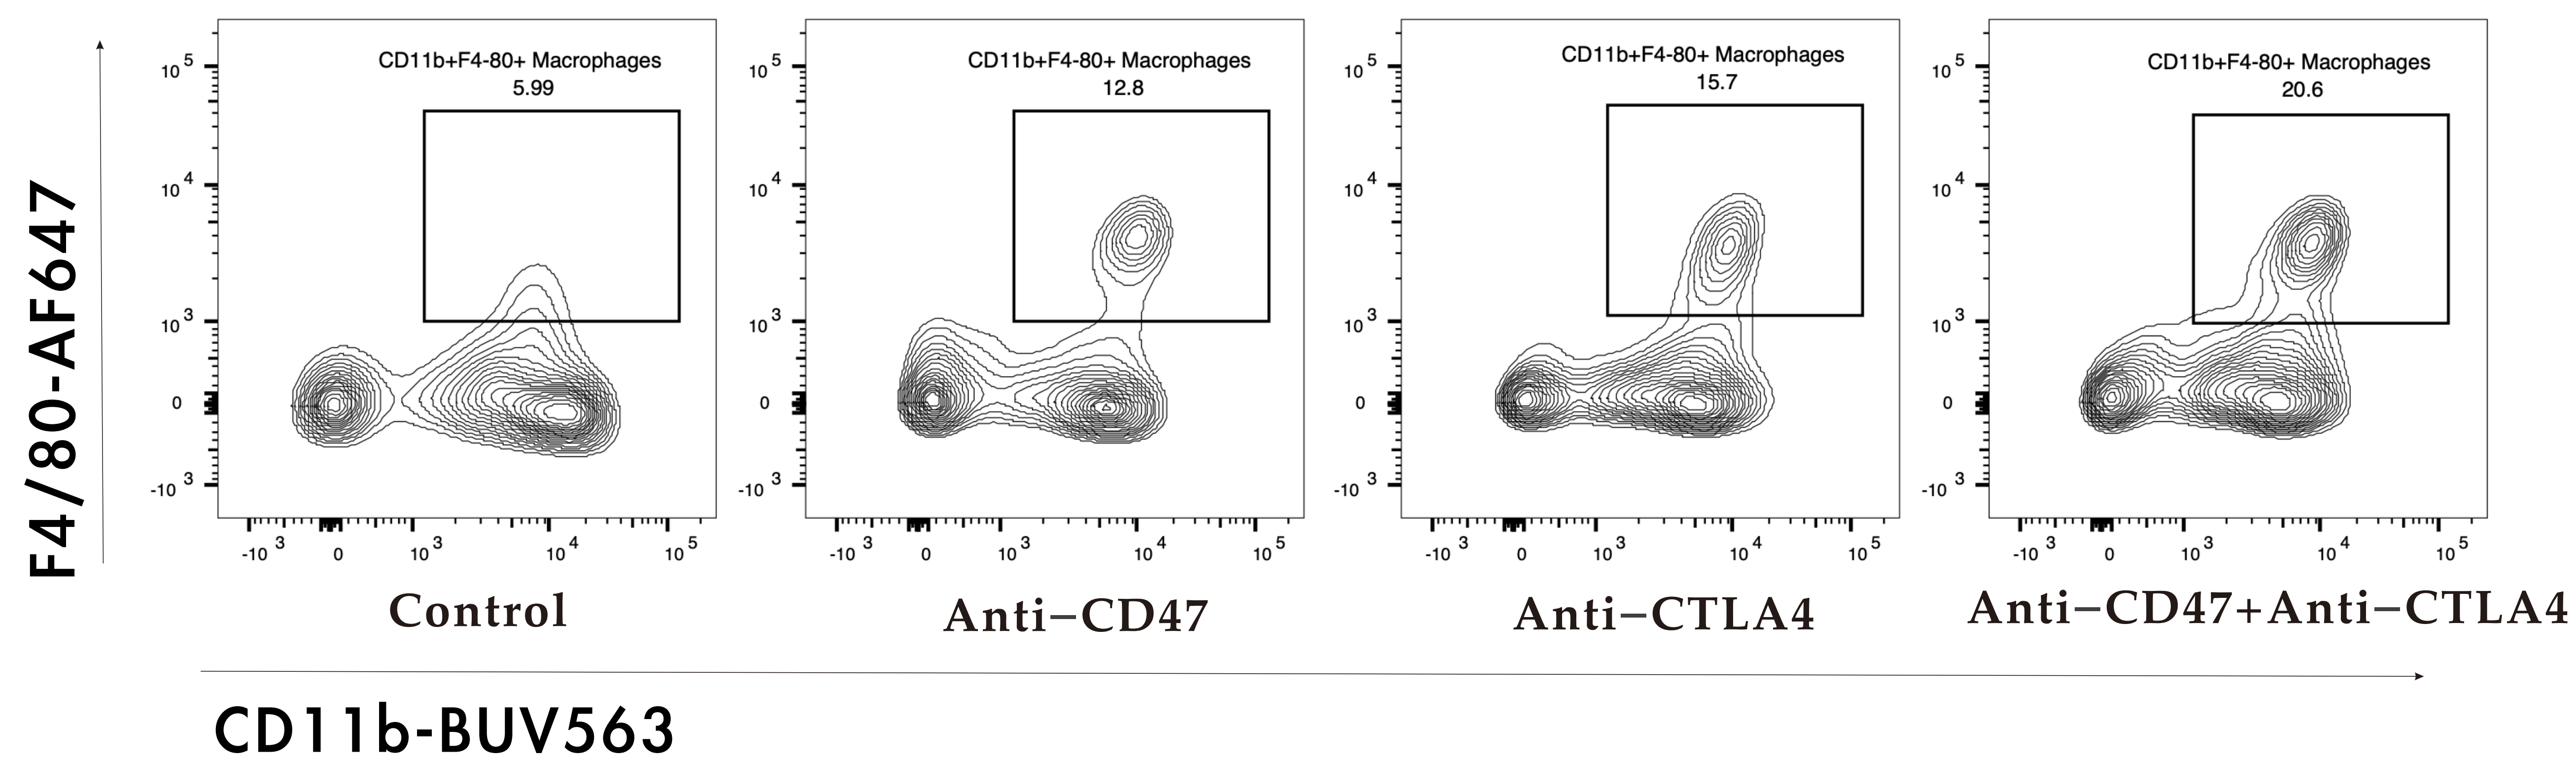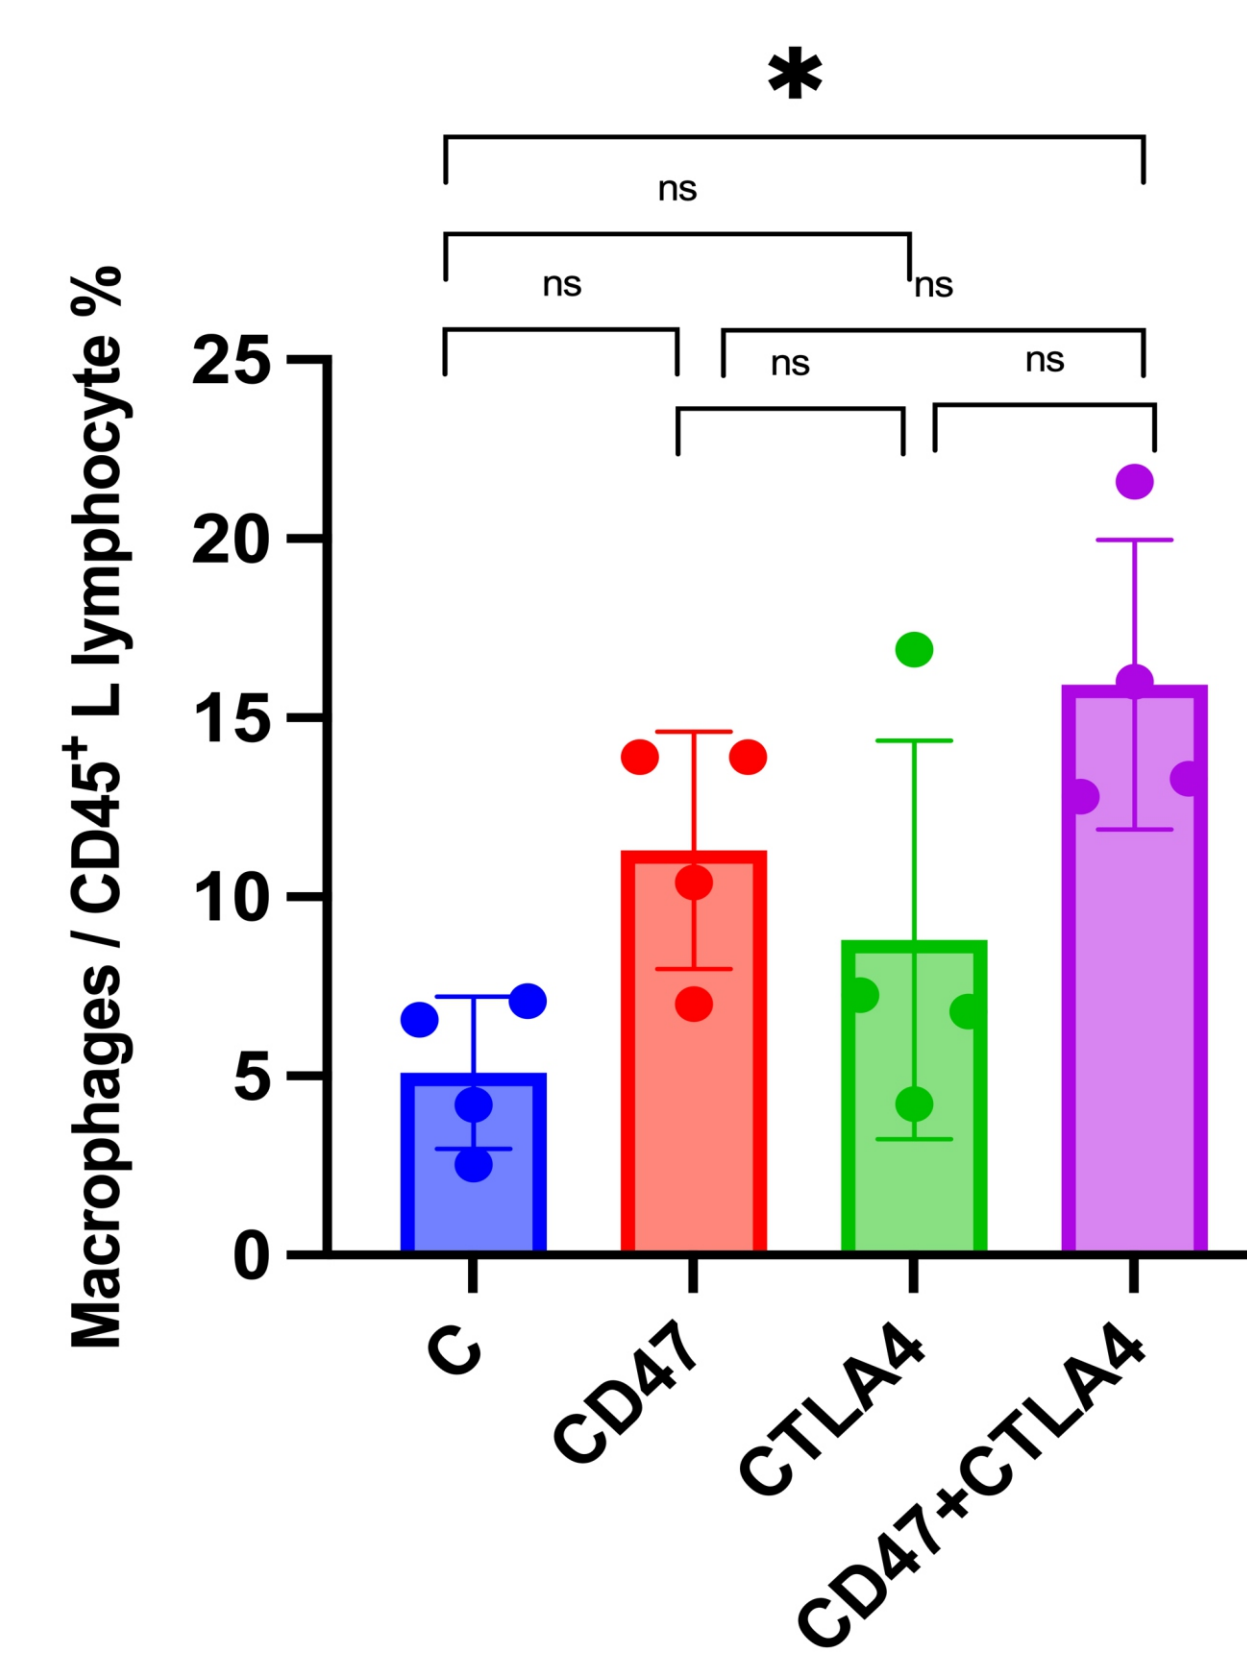

B

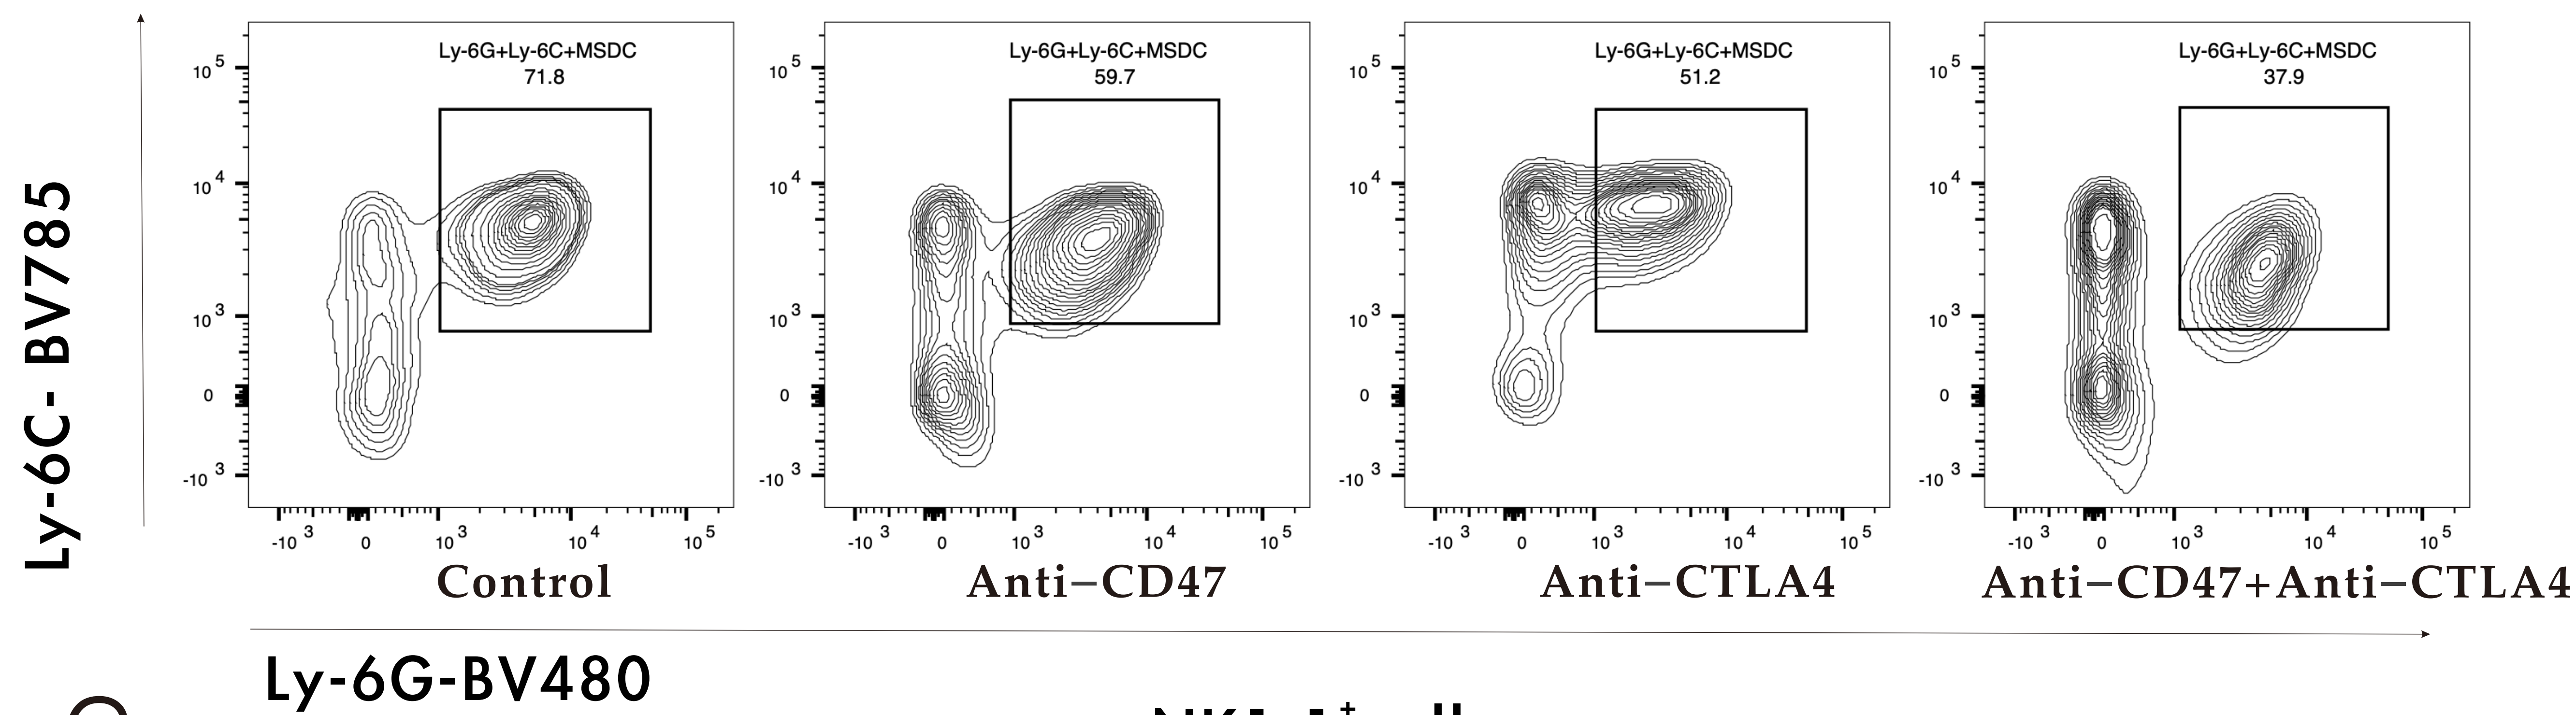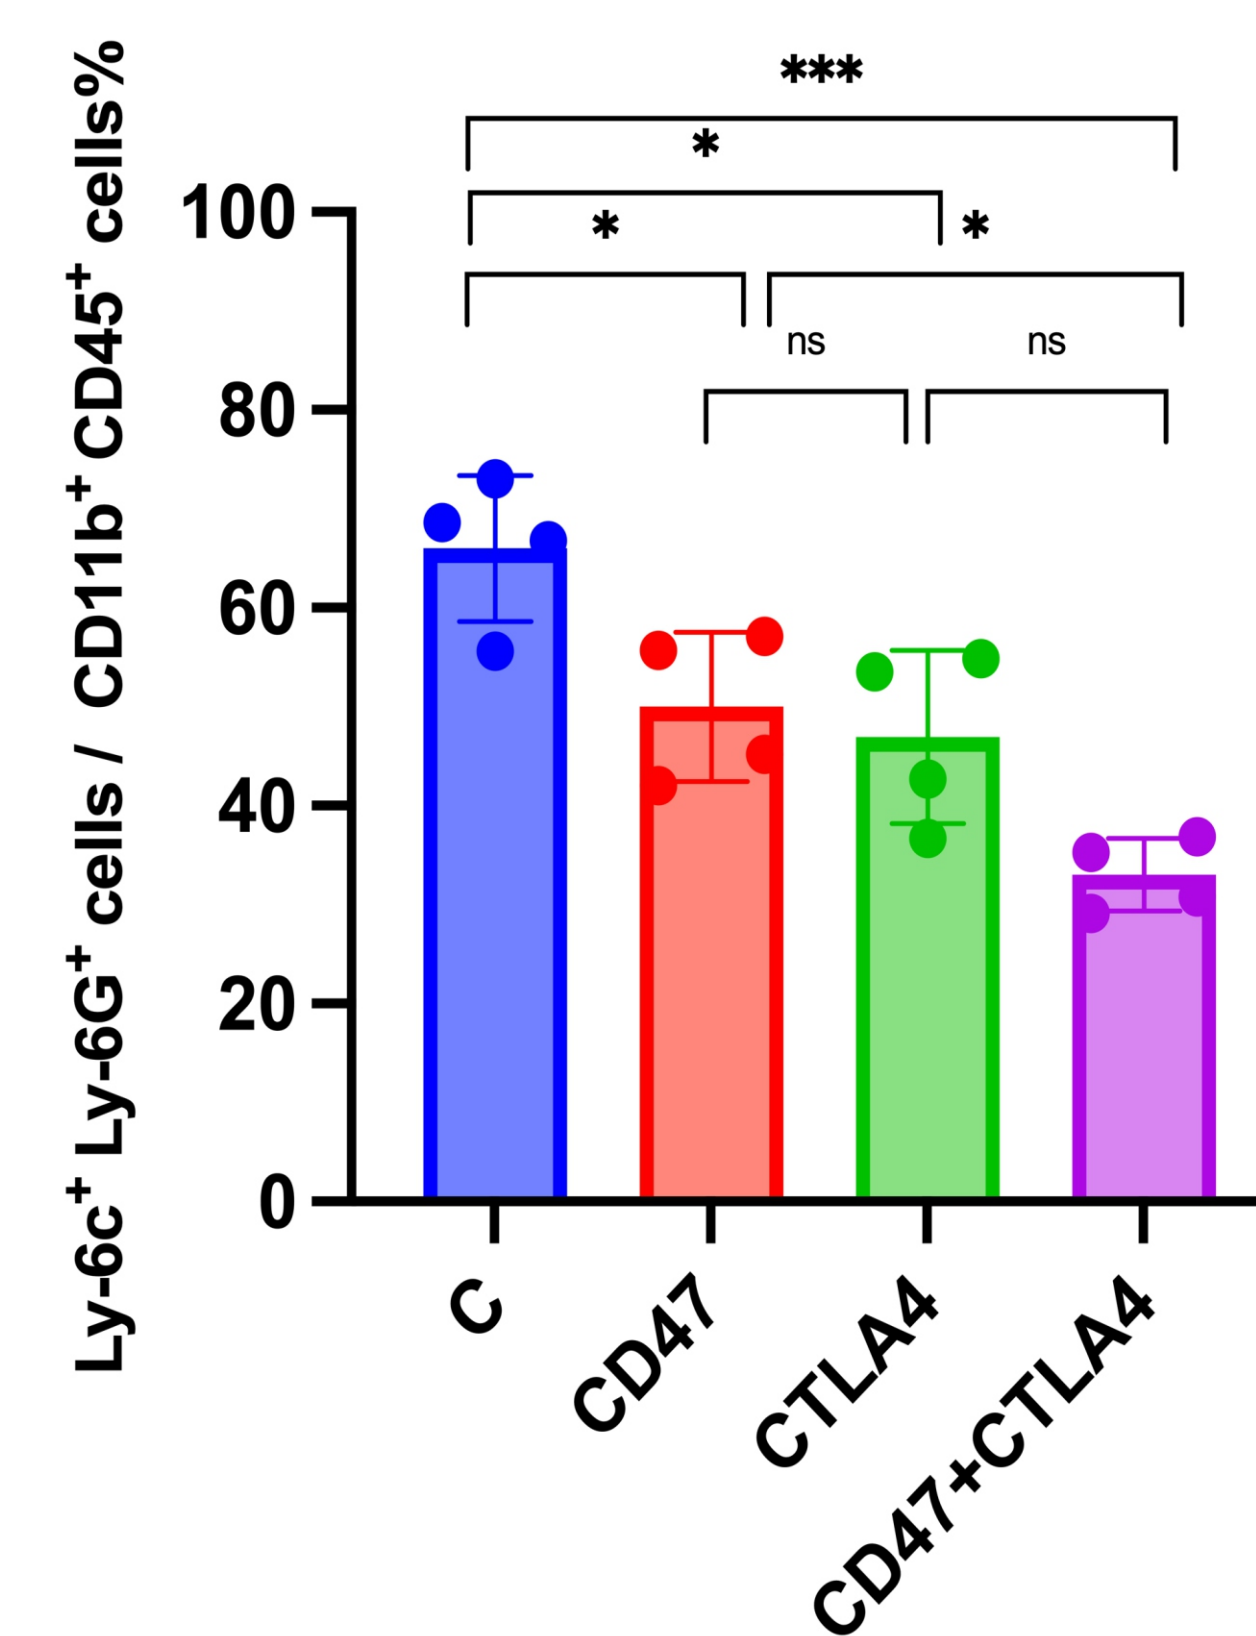

C

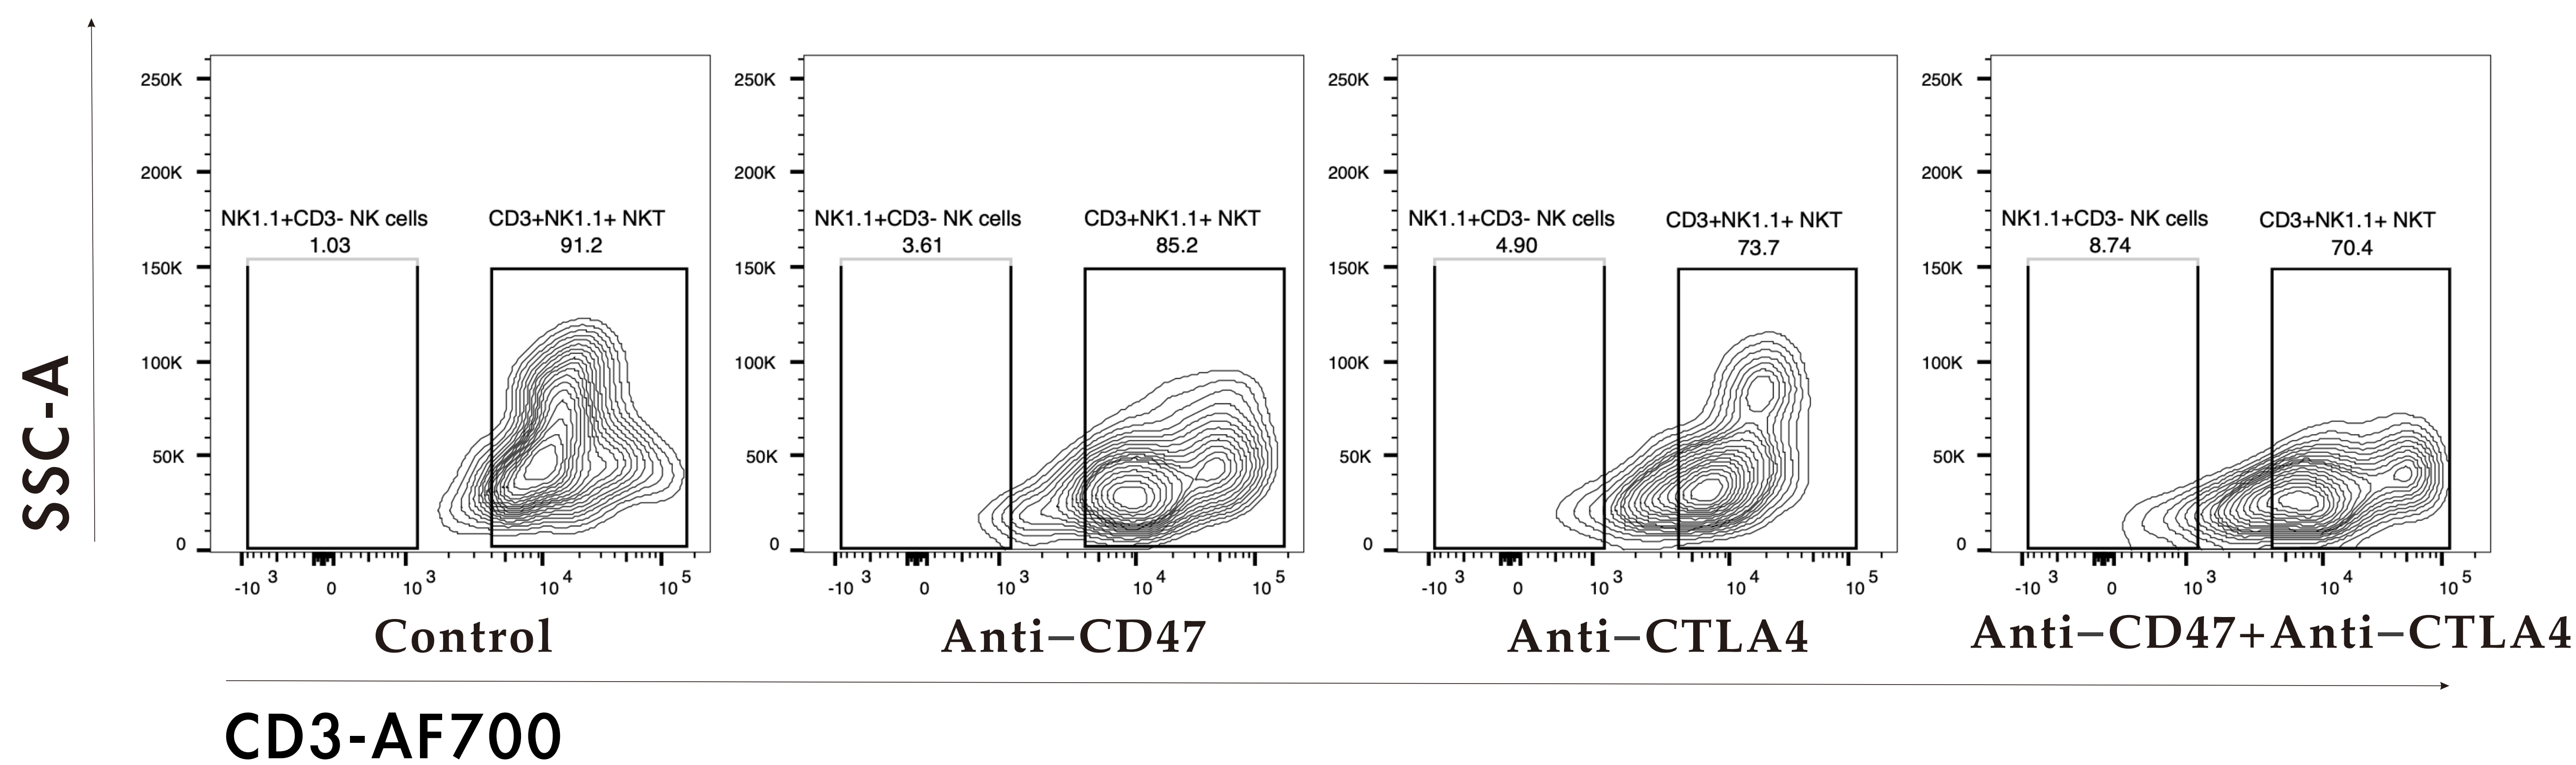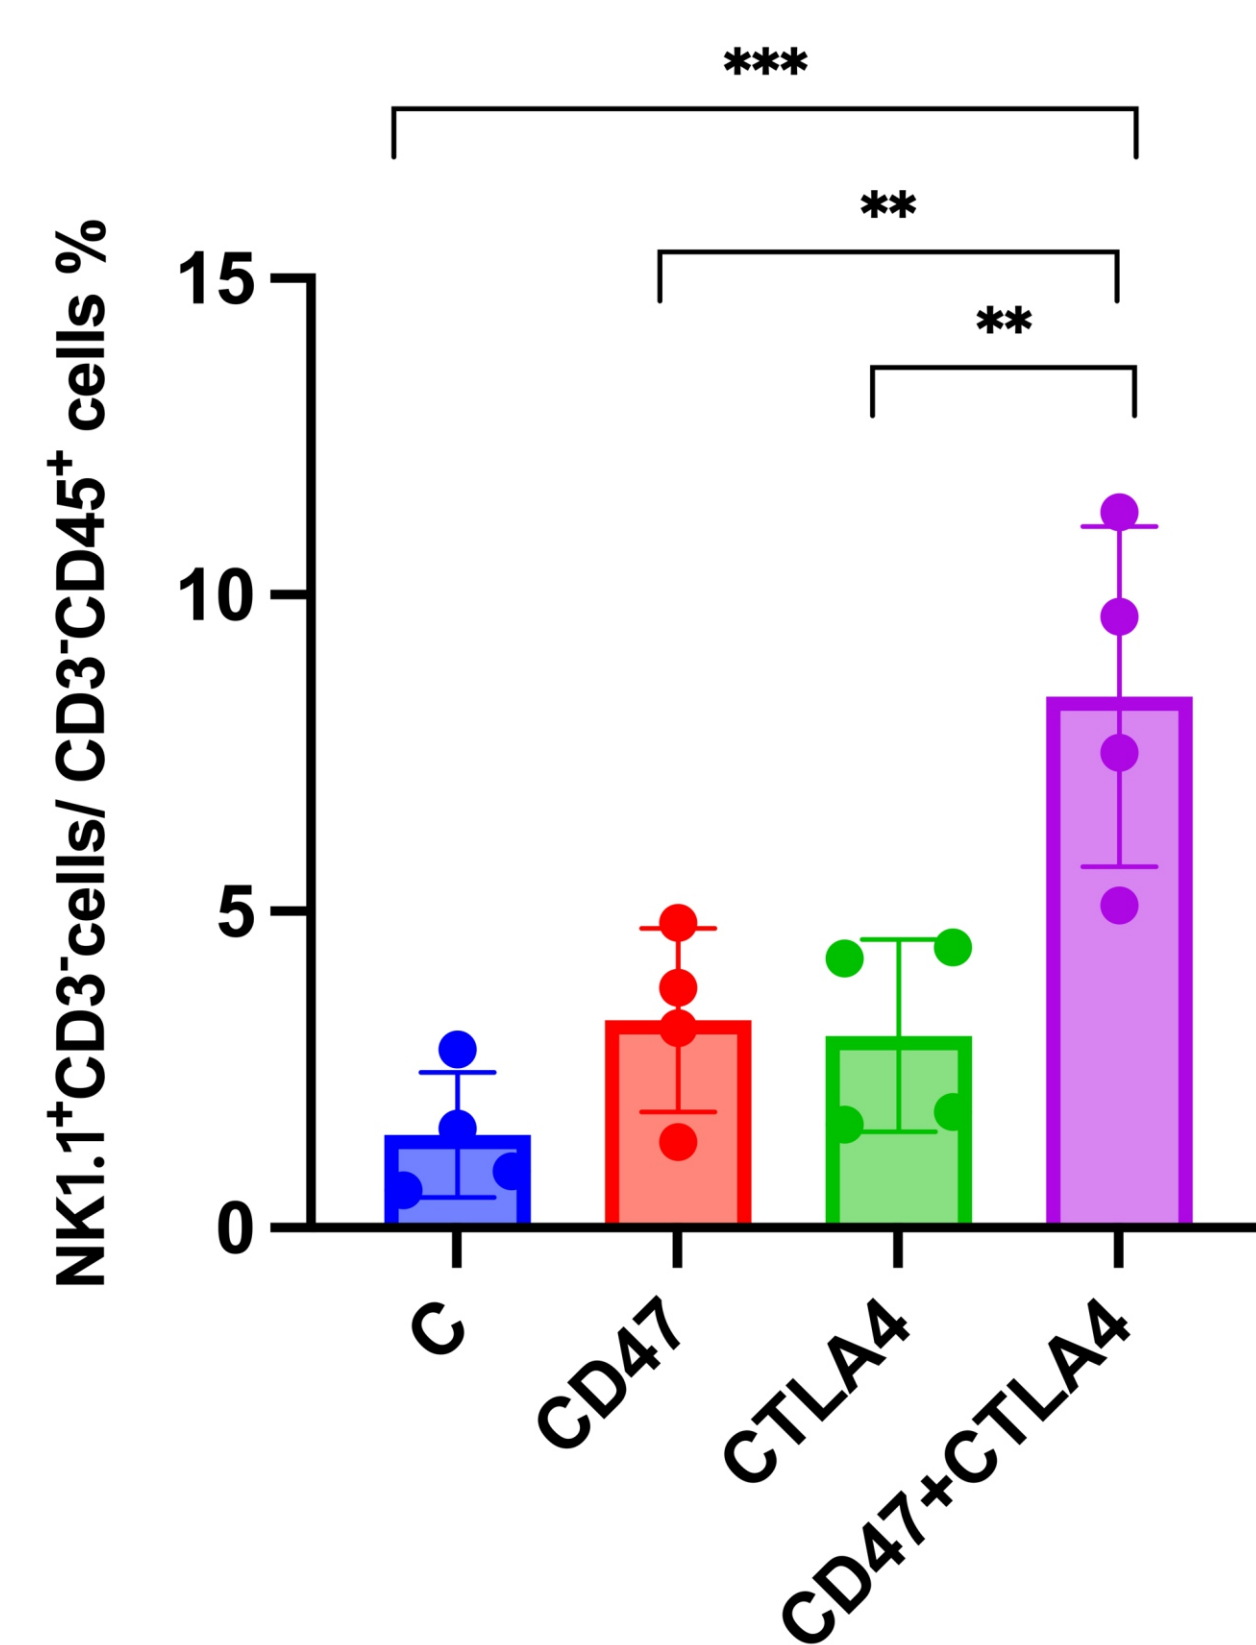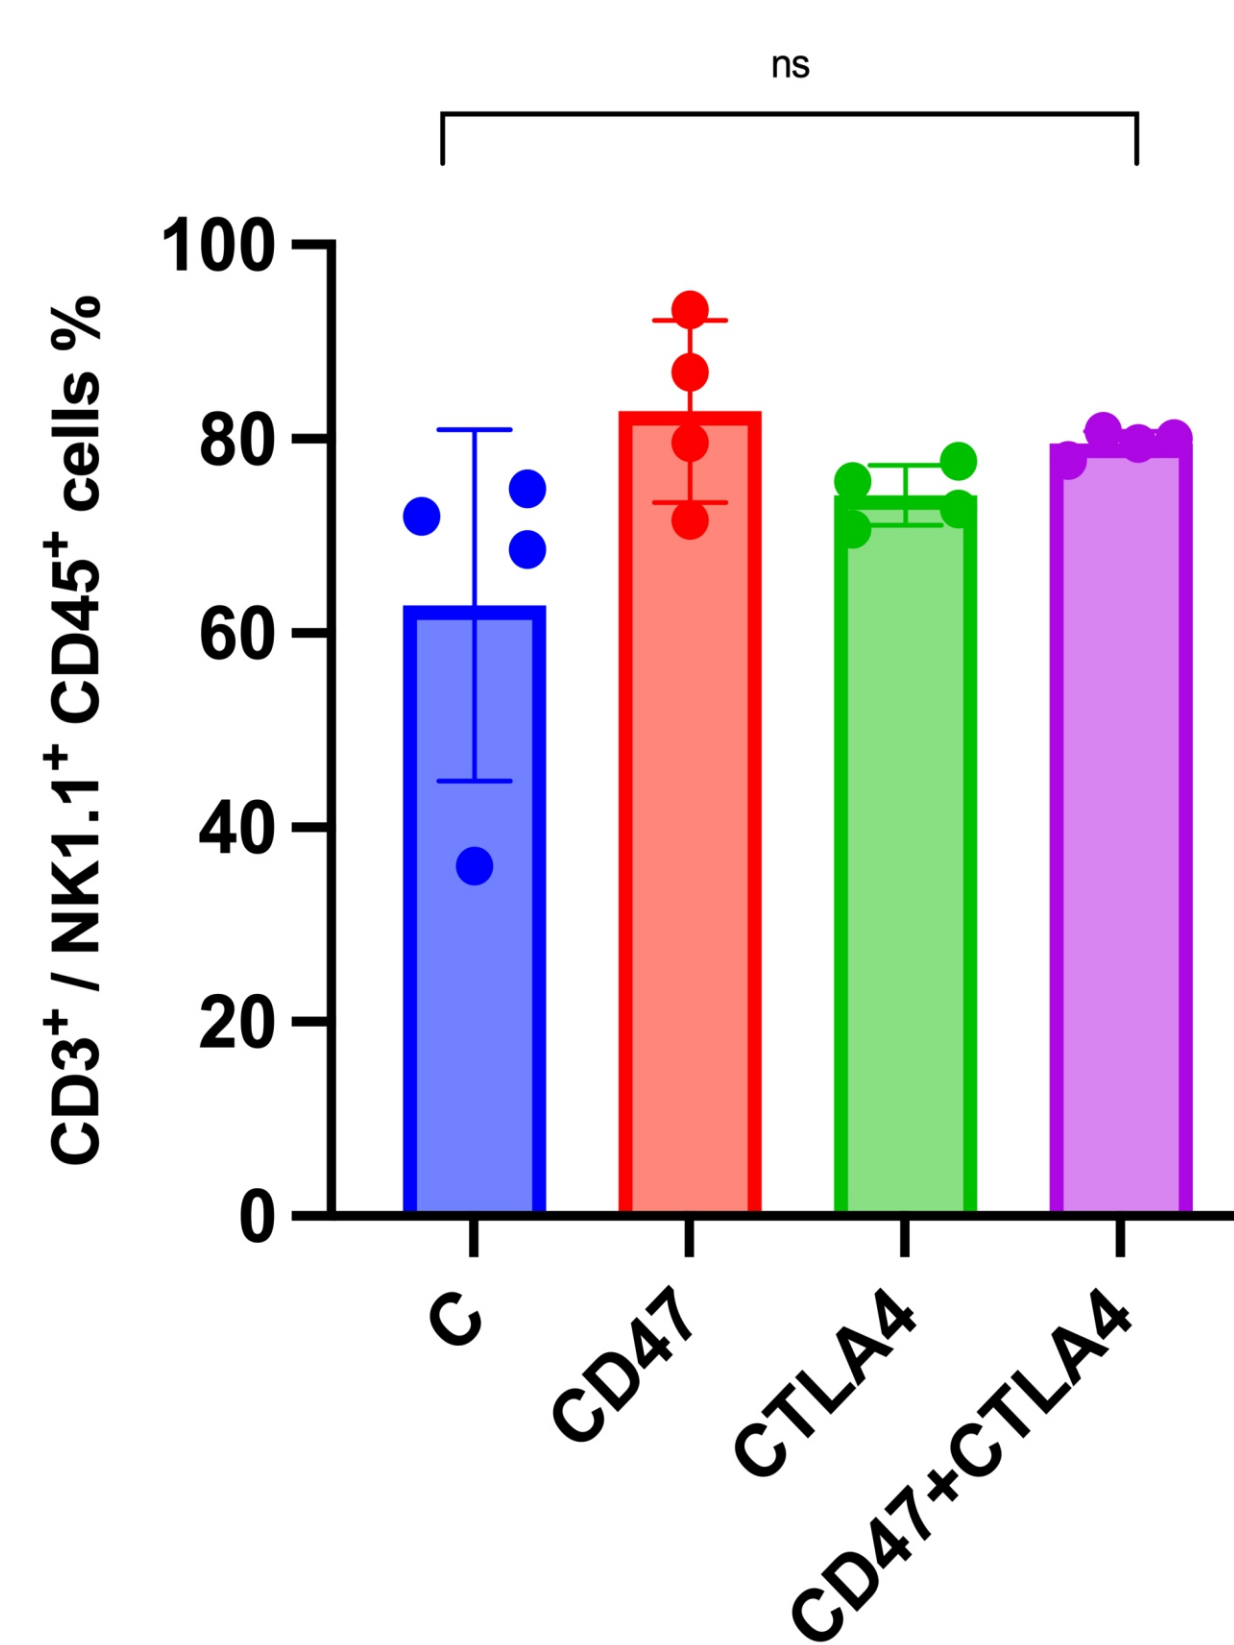



**Figure S2. Changes of macrophages, myeloid-derived suppressor cells (MDSC), natural killer (NK) cells, and natural killer T (NKT) cells in tumor infiltration in NSCLC after anti-CD47 antibody (Ab) or anti-CTLA4 Ab (i.e., an immune checkpoint blocker) alone or in combination.** (A) Lewis lung carcinoma (LLC) cells were implanted in C57BL/6 mice treated with control IgG, anti-CD47 Ab, and anti-CTLA4 Ab, alone or in combination. Flow cytometric cell sorting at day 24 revealed the following: Compared to control IgG, the fraction of tumor-associated macrophages (TAMs) is increased after combination therapy. (B) Combination therapy decreases the fraction of myeloid-derived suppressor cells (MDSCs). (C) The combination therapy promotes the infiltration of NK cells in the tumor compared to single-agent therapy and the control group, but no significant change is observed in NKT cells. Data are expressed as mean  $\pm$  standard error (SE). Data in (A–C) are analyzed with a one-way analysis of variance. \* $p < 0.05$ , \*\* $p < 0.01$ , and \*\*\* $p < 0.001$ ; ns, not significant.

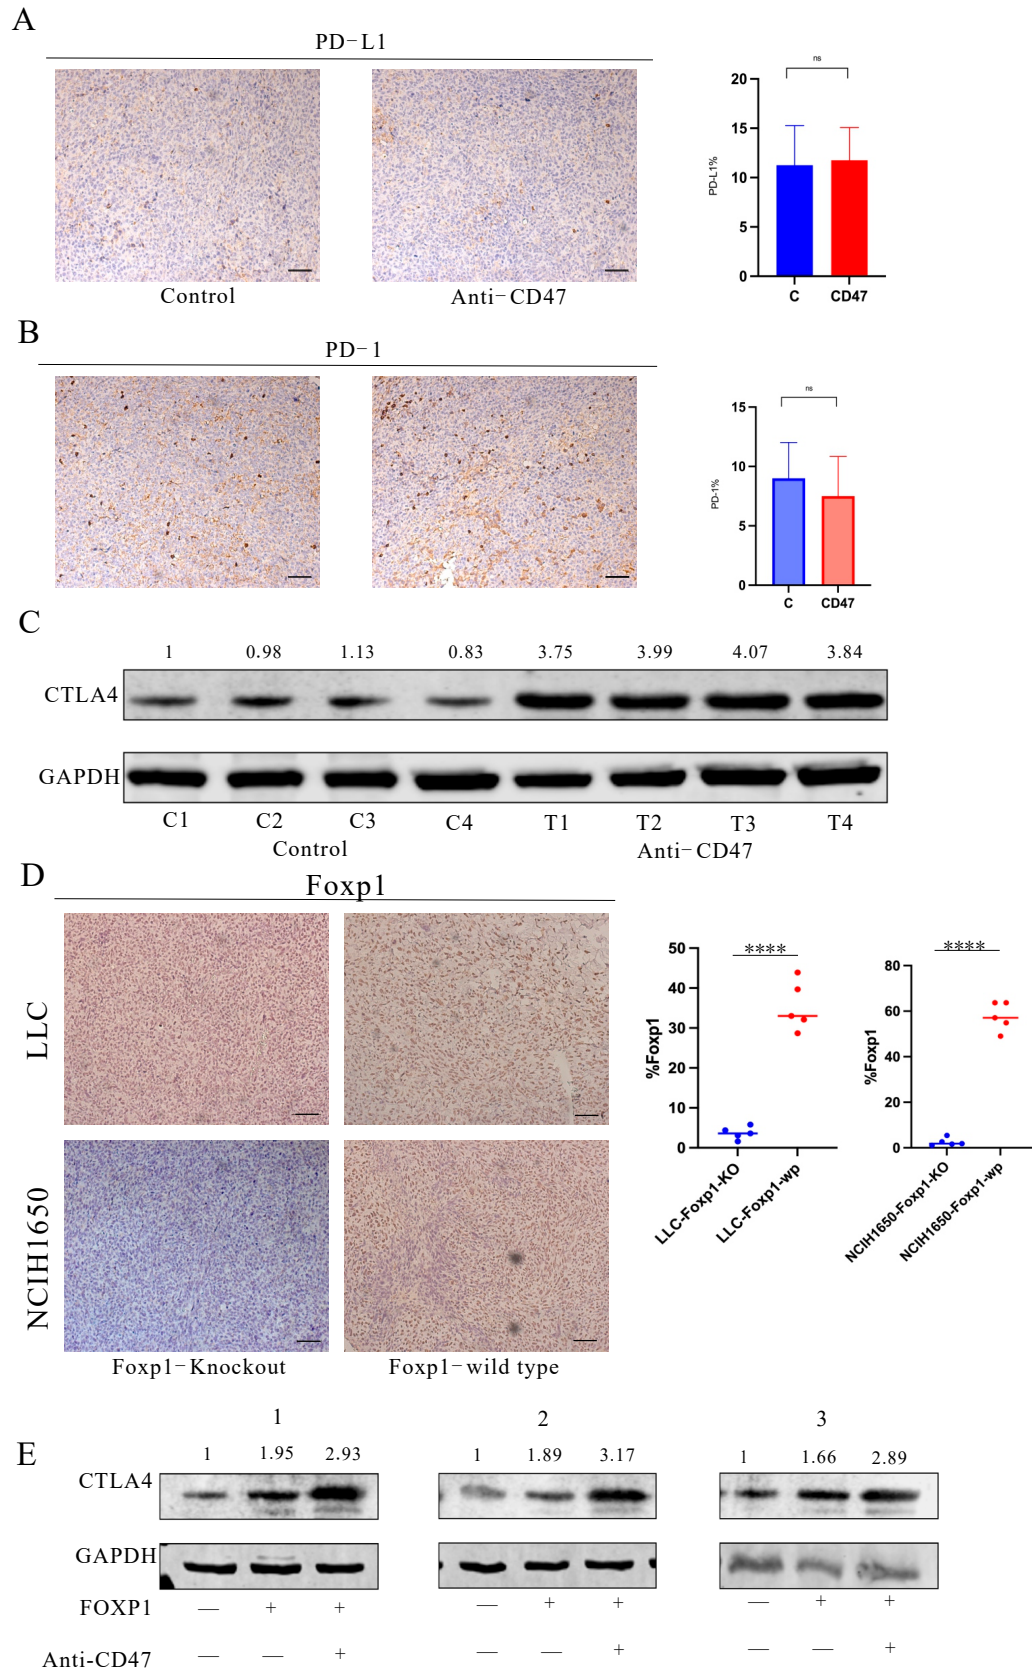

**Figure S3.** The protein level of PD-L1/PD1 in tumor tissues of Lewis lung carcinoma (LLC) cells of NSCLC-bearing mice after anti-CD47 antibody (Ab) therapy. (A–B) Representative

immunohistochemistry images and quantitative analysis showing no significant change in PD-L1 and PD-1 levels in tumor tissues after anti-CD47 Ab therapy. (C) Measurement of CTLA4 level in tumor tissues using immunoblots after treatment with anti-CD47 Ab or control IgG.

(D) IHC assesses Foxp1 level in NSCLC-bearing mice with Foxp1 deletion. The foxp1 level were significantly decreased. (E) Foxp1 deletion on LLC partially prevents the increase in CTLA4 level induced by anti-CD47 Ab treatment. Data are expressed as mean  $\pm$  standard error (SE). Data in (A–E) are evaluated with unpaired Student's t-test. \* $p < 0.05$ , \*\* $p < 0.01$ , and \*\*\* $p < 0.001$ ; ns, not significant.

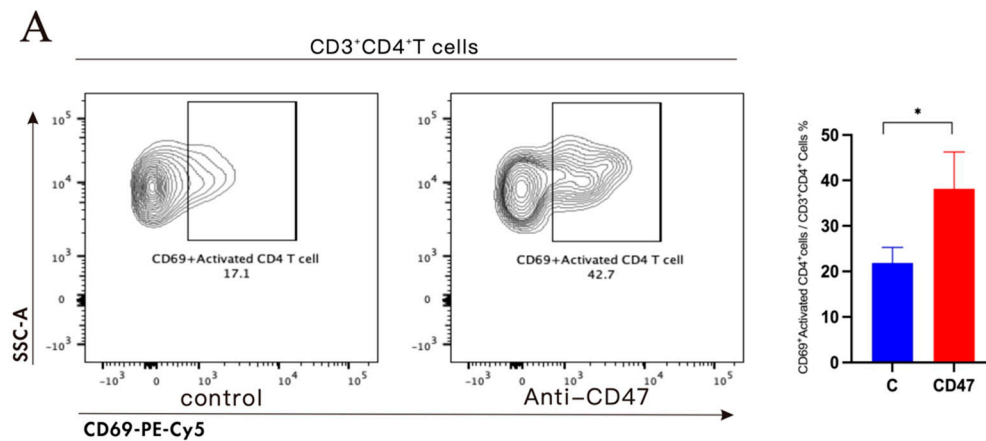

**Figure S4. Anti-CD47 antibody (Ab) increases the fraction activated CD4<sup>+</sup> T cells among immune cells infiltrating tumors of Lewis lung carcinoma cells.** (A) Anti-CD47 Ab therapy promotes the fraction of activated CD69<sup>+</sup> CD4<sup>+</sup> T cells. Data are expressed as mean  $\pm$  standard error (SE). Data in (A) are evaluated with unpaired Student's t-test. \* $p < 0.05$ , \*\* $p < 0.01$ , and \*\*\* $p < 0.001$ ; ns, not significant.

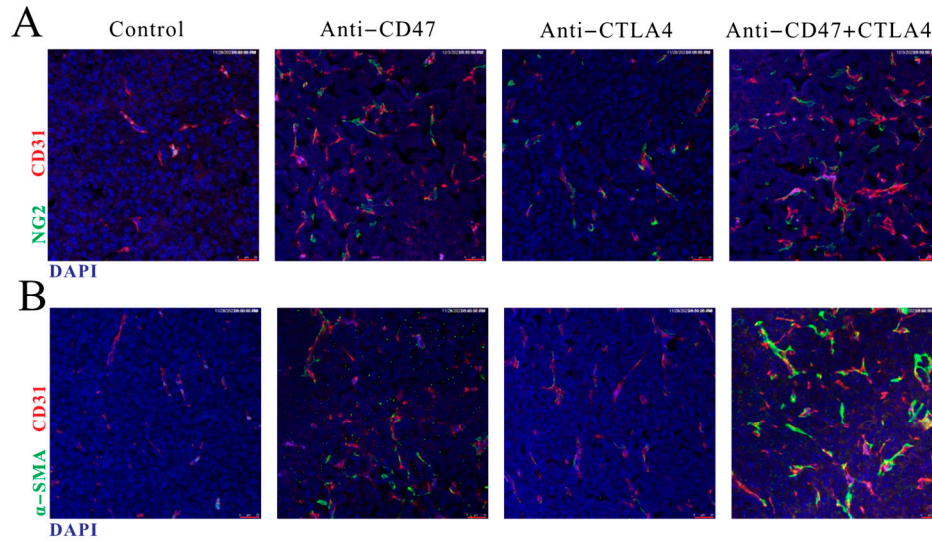

**Figure S5. The effect of combination therapy on tumor vascular normalization.**

Mice ( $n = 8$ ) bearing tumors of subcutaneously transplanted LLC cells were treated with anti-CD47 Ab thrice weekly until tumors became palpable ( $60\text{--}80\text{ mm}^3$ ). Data are representative of at least three independent experiments. (A–B) Tumor tissues of LLC cells were collected on day 24 after treatment with anti-CD47 Ab, anti-CTLA4 Ab or anti-CD47 Ab+ anti-CTLA4 Ab. Blood vessel number within tumors as determined using CD31 staining (A–B). Images were obtained for blood vessels expressing NG2 (A) and  $\alpha$ -SMA (B) in tumor tissues to evaluate blood vessels covered by pericytes and wall cells. Data are representative of three independent experiments. Scale bars,  $50\text{ }\mu\text{m}$ . DAPI, 4',6-diamidino-2-phenylindole. Data are expressed as mean  $\pm$  standard error (SE). Data in (A–B) are evaluated with unpaired Student's t-test. \* $p < 0.05$ , \*\* $p < 0.01$ , and \*\*\* $p < 0.001$ ; ns, not significant.
