# Supplementary material for: The Combination of Anti-CD47 Antibody with CTLA4 Blockade Enhances Anti-Tumor Immunity in Non-Small Cell Lung Cancer via Normalization of Tumor Vasculature and Reprogramming of the Immune Microenvironment
Source: MDPI journal article supplement (doi:10.3390/cancers16040832), 2024-02-19

Figure 3D

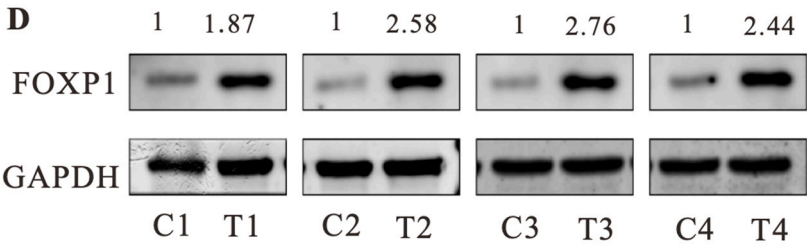

Foxp1: 75 kDa

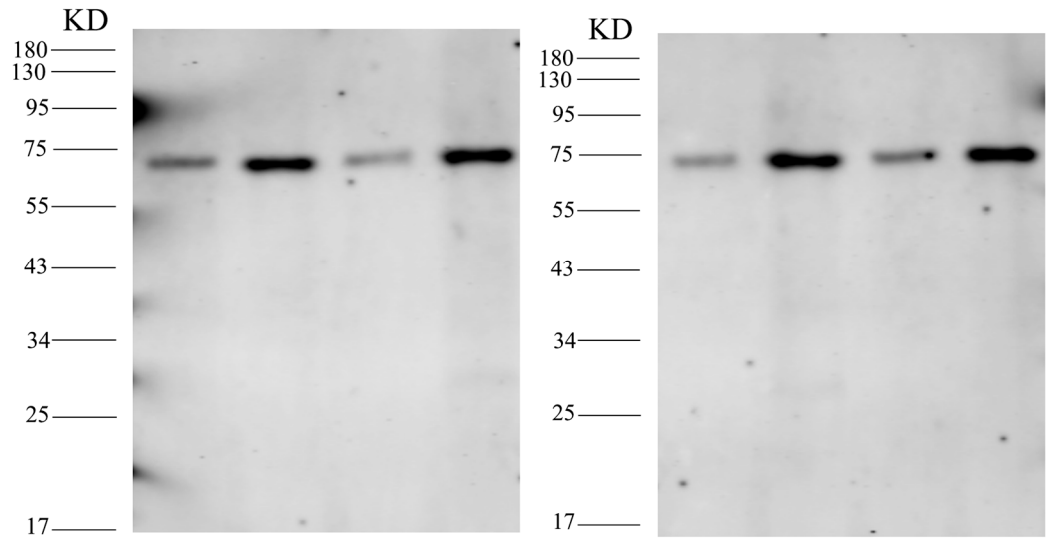

GAPDH: 37kDa

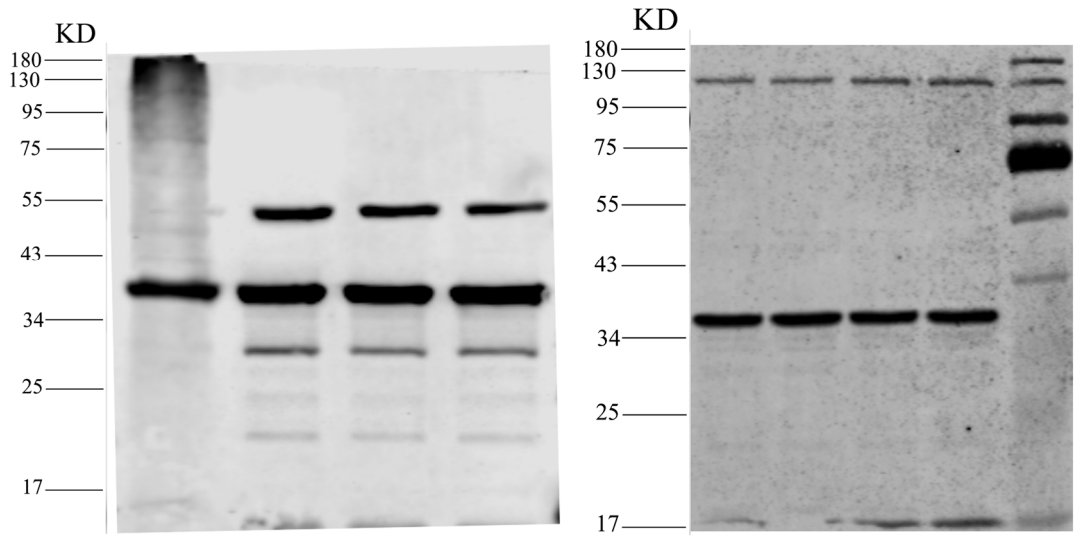

Figure 3E

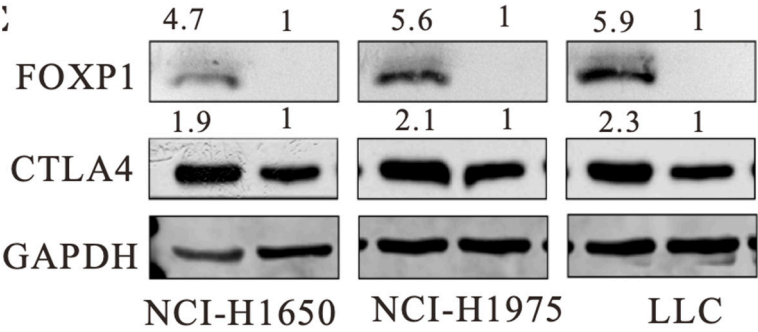

Foxp1:75kDa

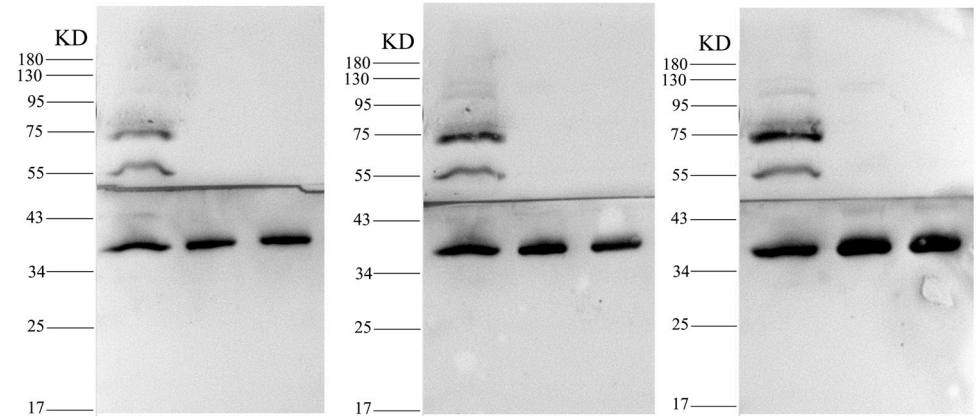

CTLA4: 37kDa

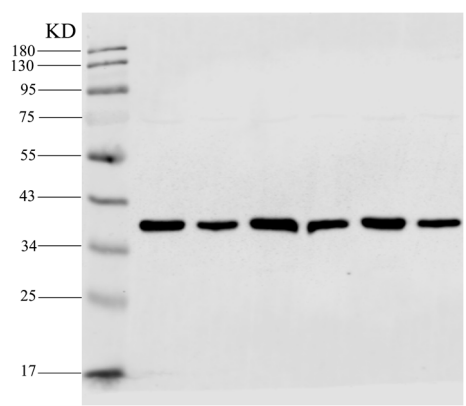

GAPDH: 37kDa

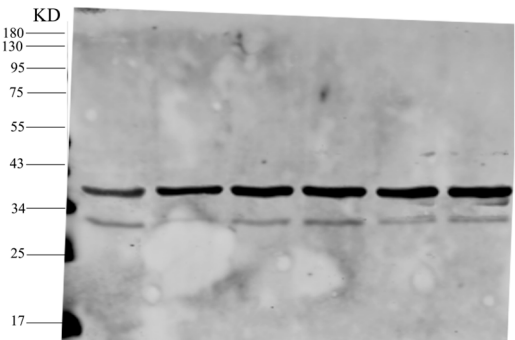

Supplement Figure S3C

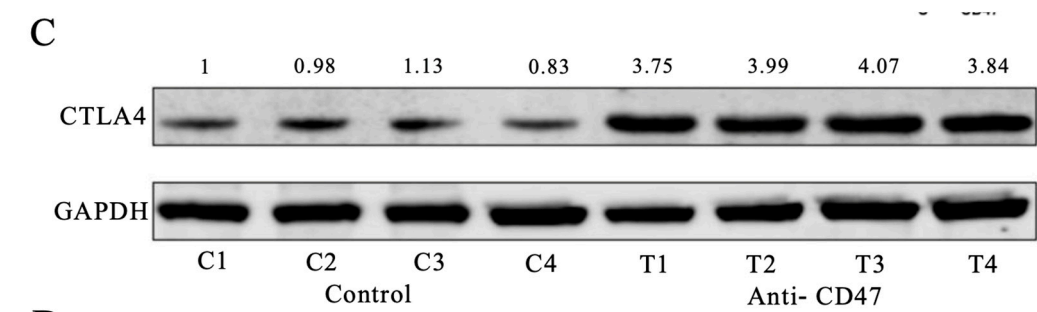

CTLA4: 37kDa

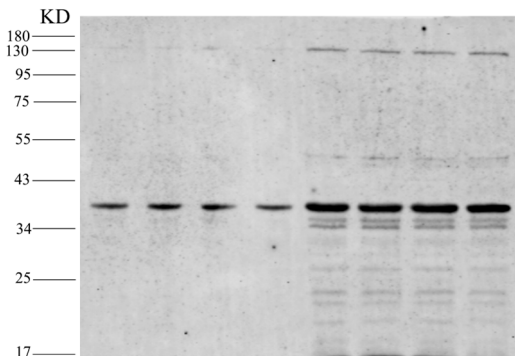

GAPDH: 37kDa

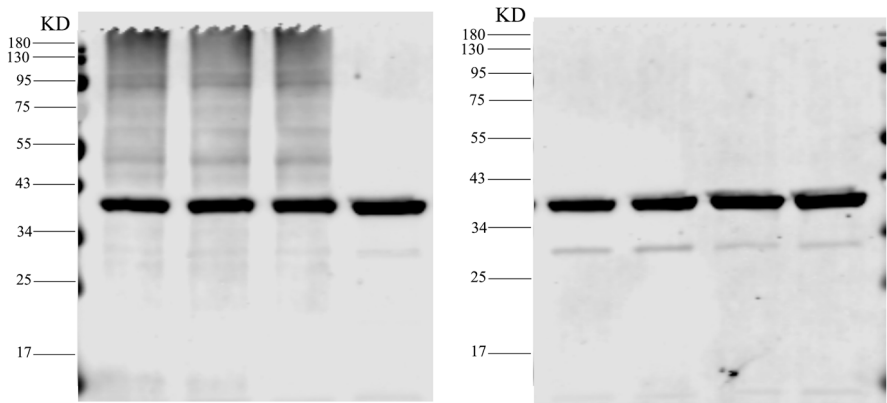

Supplement Figure S3E

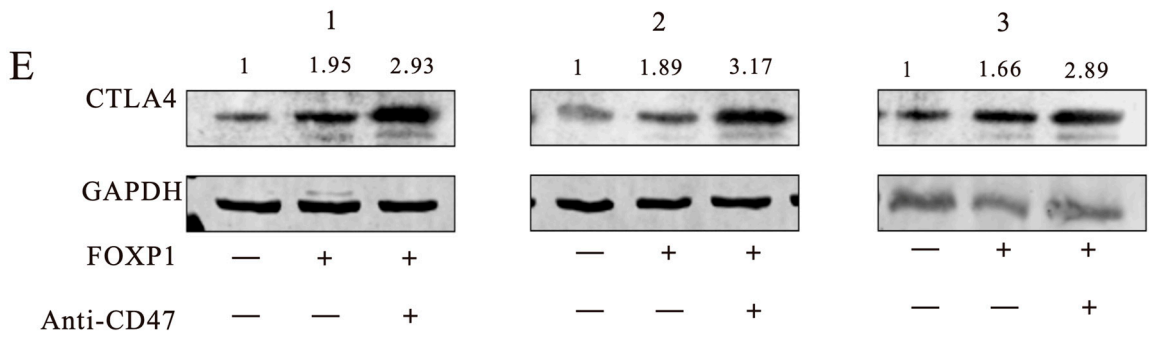

CTLA4: 37kDa

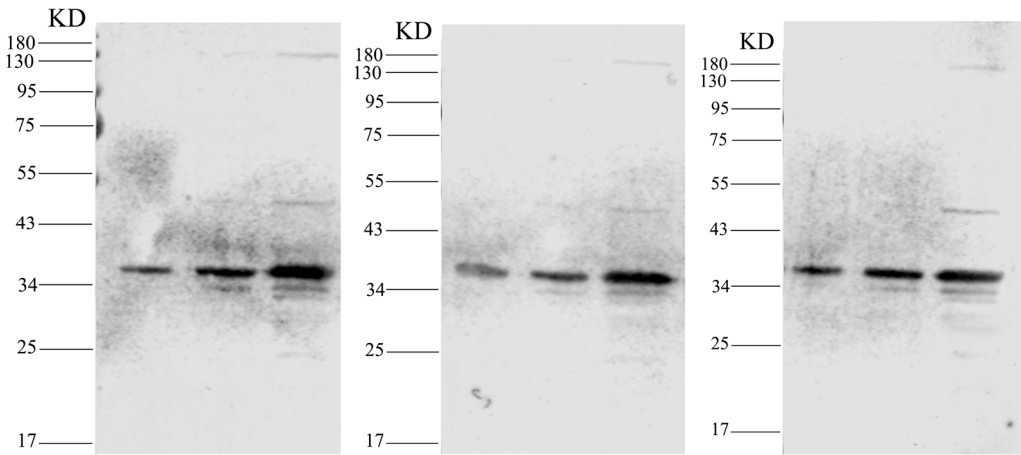

GAPDH: 37kDa

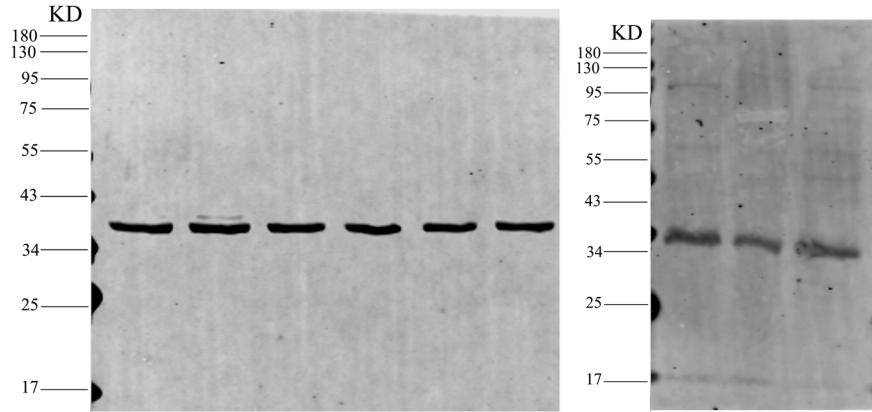

Supplement: s1 [file s1]
